# Supplementary material for: A new phenylethyl alkyl amide from the Ambrostoma quadriimpressum Motschulsky
Source: publisher site journal article supplement (doi:10.3762/bjoc.7.158), 2011-09-29

# Supporting Information

for

## **A new phenylethyl alkyl amide from the *Ambrostoma quadriimpressum* Motschulsky**

Guolei Zhao, Chao Yang, Bing Li and Wujiong Xia\*

Address: State Key Lab of Urban Water Resource and Environment & the Academy of Fundamental and Interdisciplinary Sciences, Harbin Institute of Technology, Harbin 150080, China

Email: Wujiong Xia\* - xiawj@hit.edu.cn

\* Corresponding authors

### **Detailed experimental procedures for the synthesis of compound 1**

#### Table of Contents

|                                                                                |         |
|--------------------------------------------------------------------------------|---------|
| Experimental details .....                                                     | S2-S12  |
| <sup>1</sup> H NMR and <sup>13</sup> C NMR spectra of synthetic compounds..... | S13-S30 |
| <sup>1</sup> H, <sup>13</sup> C and 2D NMR spectra of natural product 1 .....  | S31-S35 |

## Experimental details

General Methods: Commercial spectral grade solvents were used for experiments unless otherwise stated. Infrared spectra were recorded on a Perkin–Elmer 1710 Fourier transform spectrometer. Low-resolution mass spectra were obtained from Agilent 7890A-5975C GC–MS by means of electron impact (EI) ionization at 70 eV.  $^1\text{H}$  NMR spectra were obtained at 400 MHz on Bruker AV-400 instrument.  $^{13}\text{C}$  NMR spectra were recorded at 100 MHz. High-resolution mass spectra were recorded on an Agilent 1200-6520 Q-TOF electrospray mass spectrometer.

### Synthesis of (S)-5-benzyl 1-methyl 2-hydroxypentanedioate (**5**)

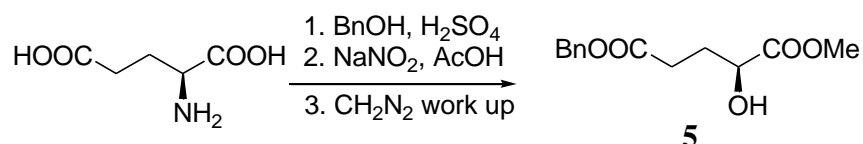

The  $\gamma$ -benzyl ester of glutamic acid (**5**) was prepared according to Rapoport et al. [1-3]. Benzyl alcohol (200 mL, 1.9 mol) was added slowly to a solution of conc.  $\text{H}_2\text{SO}_4$  (20 mL, 375 mmol) in dry  $\text{Et}_2\text{O}$  (200 mL). The solution was concentrated in vacuo, and glutamic acid (29.6 g, 201 mmol) was added sequentially. The reaction mixture was stirred overnight at r.t., then 95% EtOH (400 mL) and pyridine (100 mL) were added. The mixture was stirred for 1 h in an ice bath. The white precipitate  $\gamma$ -benzylglutamic acid was obtained by filtration, washed with  $\text{Et}_2\text{O}$ , dried at 60 °C for 24 h in vacuo, and was used for next step without further purification (yield 28.6 g, 60%). To a solution of  $\gamma$ -benzylglutamic acid (23.8 g, 100 mmol) in  $\text{H}_2\text{O}$  (150 mL) and AcOH (50 mL), a solution of  $\text{NaNO}_2$  (10.3 g, 149 mmol) in  $\text{H}_2\text{O}$  (100 mL) was added slowly over 4 h. After stirring for 2 h at rt, the reaction mixture was extracted with  $\text{CHCl}_3$  and isopropanol (v/v = 3:1). The extracts were washed with brine, dried with  $\text{Na}_2\text{SO}_4$ , and concentrated in vacuo to give a colorless oil. The crude product was immediately

esterified with  $\text{CH}_2\text{N}_2$  in  $\text{Et}_2\text{O}$ , and then concentrated in vacuo. Column chromatography ( $\text{SiO}_2$ ,  $\text{AcOEt/PE}$  1:1) of the residue afforded compound **5** (12.4 g, 70%) as a colorless oil.  $[\alpha]_{\text{D}}^{20}$   $-13.8$  ( $c$  0.52,  $\text{CHCl}_3$ ); IR (film,  $\text{KBr}$ )  $\nu_{\text{max}}$ : 3487, 2944, 1738, 1455, 1162  $\text{cm}^{-1}$ ;  $^1\text{H}$  NMR (400 MHz,  $\text{CDCl}_3$ ):  $\delta$  7.38–7.31 (m, 5H), 5.12 (s, 2H), 4.27–4.22 (m, 1H), 3.77 (s, 3H), 2.98 (t,  $J = 6.4$  Hz, 1H), 2.59–2.47 (m, 2H), 2.23–2.16 (m, 1H), 1.99–1.93 (m, 1H);  $^{13}\text{C}$  NMR (100 MHz,  $\text{CDCl}_3$ ):  $\delta$  175.0, 173.0, 135.9, 128.6, 128.3, 128.2, 69.5, 66.4, 52.7, 29.7, 29.3; EIMS ( $m/z$ ): 252, 234, 145, 108, 91(base), 85; HRMS–ESI: Calcd. for  $\text{C}_{13}\text{H}_{16}\text{O}_5$ : 253.1076  $[\text{M} + \text{H}]^+$ . Found: 253.1080.

### Synthesis of (S)-5-benzyl 1-methyl 2-(*tert*-butyldiphenylsilyloxy)-pentanedioate (**6**)

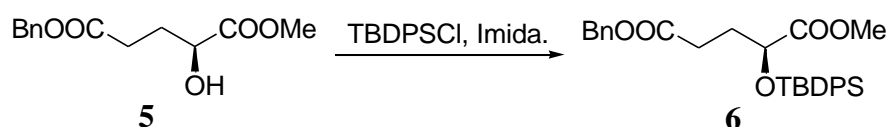

Imidazole (1.36 g, 20 mmol) was added sequentially to a solution of **5** (2.52 g, 10 mmol) in dry  $\text{CH}_2\text{Cl}_2$  (150 mL) at 0 °C. The mixture was stirred for 15 min, and then TBDPSCI (4.12 g, 15 mmol) was added and stirred at rt for 3 h. The reaction mixture was quenched with  $\text{H}_2\text{O}$  and extracted with  $\text{CH}_2\text{Cl}_2$ . The combined extracts were washed with brine, dried ( $\text{Na}_2\text{SO}_4$ ) and concentrated in vacuo. Column chromatography ( $\text{SiO}_2$ , 10%  $\text{AcOEt}$  in  $\text{PE}$ ) of the residue afforded TBDPS ether (**6**) (4.9 g, 100%) as a colorless oil.  $[\alpha]_{\text{D}}^{20}$   $-12.8$  ( $c$  1.0,  $\text{CHCl}_3$ ); IR (film,  $\text{KBr}$ )  $\nu_{\text{max}}$ : 2945, 2831, 1740, 1455, 1109, 751, 699  $\text{cm}^{-1}$ ;  $^1\text{H}$  NMR (400 MHz,  $\text{CDCl}_3$ ):  $\delta$  7.76–7.71 (m, 4H), 7.69–7.58 (m, 11H), 5.09 (s, 2H), 4.32 (t,  $J = 5.2$  Hz, 1H), 3.77 (s, 3H), 2.58 (m, 1H), 2.46 (m, 1H), 2.08 (m, 2H), 1.09 (s, 9H);  $^{13}\text{C}$  NMR (100 MHz,  $\text{CDCl}_3$ ):  $\delta$  172.9, 172.9, 136.0, 135.8, 135.2, 133.1, 132.9, 129.9, 129.8, 128.6, 127.7, 127.6, 71.4, 66.3, 51.5, 30.0, 29.2, 26.9, 19.4.

EIMS ( $m/z$ ): 433, 373, 289, 265, 237, 213, 183, 153, 135, 91(base). HRMS (ESI): Calcd. for  $C_{29}H_{34}O_5Si$ : 508.2519  $[M + NH_4]^+$ . Found: 508.2530.

### Synthesis of (*S*)-methyl 2-(*tert*-butyldiphenylsilyloxy)-5-hydroxy pentanoate (**7**)

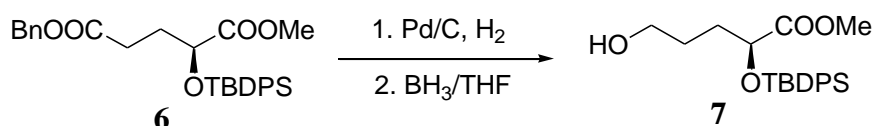

To a solution of **6** (4.9 g, 10 mmol) in MeOH (30 mL), 10% Pd/C (447 mg) was added and the mixture was hydrogenated for 12 h. It was then filtered through a short pad of Celite and the filter cake was washed with MeOH. The filtrate was concentrated in vacuo to give the acid as a colorless oil, which was used without further purification.

To a solution of the above acid in dried THF (30 mL) at  $-5\text{ }^{\circ}\text{C}$ ,  $BH_3 \cdot THF$  (1.0 M in THF, 11 mL) was added over 10 min. After addition, the reaction mixture was allowed to warm to rt for 3 h. Then it was carefully quenched with MeOH at  $0\text{ }^{\circ}\text{C}$  and concentrated in vacuo. Purification of the residue by flash chromatography ( $SiO_2$ , AcOEt/PE 1:1) provided the alcohol **7** (3.67 g, 95%) as a colorless oil.  $[\alpha]_D^{20} -33.2$  ( $c$  0.93,  $CHCl_3$ ); IR (film, KBr)  $\nu_{max}$ : 3434, 2952, 1755, 1427, 1111  $cm^{-1}$ ;  $^1H$  NMR (400 MHz,  $CDCl_3$ ):  $\delta$  7.68–7.63 (m, 4H), 7.44–7.34 (m, 6H), 4.29 (t,  $J = 5.6$  Hz, 1H), 3.59 (t,  $J = 6.4$  Hz, 2H), 3.49 (s, 3H), 1.84–1.77 (m, 2H), 1.66–1.59 (m, 2H), 1.10 (s, 9H);  $^{13}C$  NMR (100 MHz,  $CDCl_3$ ):  $\delta$  173.4, 136.0, 13.8, 133.3, 133.0, 129.9, 129.8, 127.7, 127.5, 72.3, 62.5, 51.5, 31.5, 27.8, 26.9, 19.4; EIMS ( $m/z$ ): 297 (base), 277, 253, 227, 199, 183, 165, 135, 105, 77. HRMS–ESI: Calcd for  $C_{22}H_{30}O_4Si$ : 387.1992  $[M + H]^+$ . Found: 387.1991.

Synthesis of (*S*)-methyl 5-(*tert*-butyldimethylsilyloxy)-2-(*tert*-butyldiphenylsilyloxy)pentanoate (**8**)

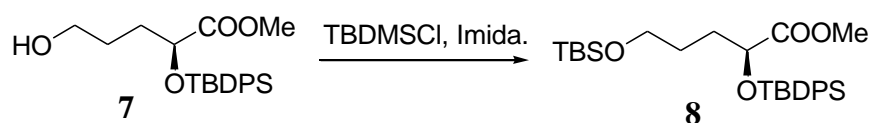

To a solution of **7** in anhydrous  $\text{CH}_2\text{Cl}_2$  (40 mL) were added imidazole (1.29 g, 19 mmol) and TBSCl (2.15 g, 14.3 mm). After stirring for 5 h at rt, the reaction mixture was quenched with  $\text{H}_2\text{O}$  and extracted with  $\text{CH}_2\text{Cl}_2$ . The extracts were washed with brine, dried ( $\text{Na}_2\text{SO}_4$ ), and concentrated in vacuo. Column chromatography (5% EtOAc in PE) of the residue afforded the TBS ether **8** (4.75 g, 100 %) as a colorless oil.  $[\alpha]_{\text{D}}^{20}$   $-18.3$  (c 0.52,  $\text{CHCl}_3$ ); IR (film, KBr)  $\nu_{\text{max}}$ : 2948, 1757, 1473, 1427, 1257, 1192, 1107  $\text{cm}^{-1}$ ;  $^1\text{H}$  NMR (400 MHz,  $\text{CDCl}_3$ ):  $\delta$  7.70–7.64 (m, 4H), 7.45–7.36 (m, 6H), 4.27 (t,  $J = 5.6$  Hz, 2H), 3.60–3.55 (m, 2H), 3.50 (s, 3H), 1.80–1.76 (m, 2H), 1.65–1.56 (m, 2H), 1.12 (s, 9H), 0.90 (s, 9H), 0.04 (s, 6H);  $^{13}\text{C}$  NMR (100 MHz,  $\text{CDCl}_3$ ):  $\delta$  173.6, 136.0, 135.8, 133.4, 133.2, 129.8, 129.7, 127.6, 127.5, 72.5, 62.8, 51.4, 31.6, 27.9, 26.9, 25.9, 19.4, 18.3,  $-5.3$ ; EIMS ( $m/z$ ): 485, 443, 415, 355, 309, 283, 213, 183, 135, 91, 75. HRMS–ESI: Calcd for  $\text{C}_{28}\text{H}_{44}\text{O}_4\text{Si}_2$ : 501.2856  $[\text{M} + \text{H}]^+$ . Found: 501.2859.

Synthesis of (*S*)-5-(*tert*-butyldimethylsilyloxy)-2-(*tert*-butyldiphenylsilyloxy)pentan-1-ol (**9**)

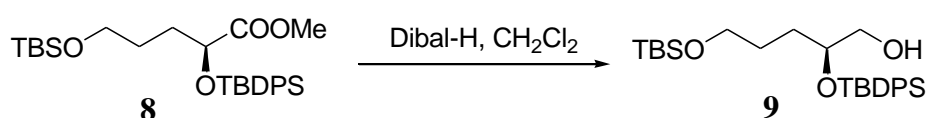

To a solution of **8** (1.1 g, 2.1 mmol) in  $\text{CH}_2\text{Cl}_2$  at  $-78$  °C Dibal-H (3.0 mL, 1.487 mol/L in toluene, 4.4 mmol) was added. After stirring for 30 min at this temperature, the reaction mixture was then stirred at rt for 2 h. The reaction mixture was then carefully quenched with saturated aqueous  $\text{NH}_4\text{Cl}$ , and diluted with AcOEt, filtered, washed

with brine, dried ( $\text{Na}_2\text{SO}_4$ ) and concentrated in vacuo. Purification by flash chromatography (10% AcOEt in PE) gave the product (854 mg, 86%) as a colorless oil.  $[\alpha]_{\text{D}}^{20} +26.6$  ( $c$  0.83,  $\text{CHCl}_3$ ); IR (film, KBr)  $\nu_{\text{max}}$ : 3452, 2931, 1428, 1111, 702  $\text{cm}^{-1}$ ;  $^1\text{H}$  NMR (400 MHz,  $\text{CDCl}_3$ ):  $\delta$  7.71–7.67 (m, 4H), 7.46–7.37 (m, 6H), 3.82–3.81 (m, 1H), 3.55–3.40 (m, 4H), 1.87 (t,  $J = 6.4$  Hz, 1H), 1.65–1.40 (m, 4H), 1.09 (s, 9H), 0.87 (s, 9H),  $-0.01$  (s, 6H);  $^{13}\text{C}$  NMR (100 MHz,  $\text{CDCl}_3$ ):  $\delta$  135.9, 135.7, 134.0, 133.8, 129.8, 127.8, 127.7, 73.9, 65.9, 63.1, 30.0, 28.3, 27.1, 26.0, 19.4, 18.3,  $-5.3$ ; EIMS ( $m/z$ ): 415, 309, 283, 253, 199, 181, 159, 135. HRMS–ESI: Calcd for  $\text{C}_{27}\text{H}_{45}\text{O}_3\text{Si}_2$ : 473.2907,  $[\text{M} + \text{H}]^+$ . Found: 473.2911.

### Synthesis of (S)-1-(*tert*-butyl(1-(*tert*-butyldimethylsilyloxy)dodec-5-en-4-yloxy)(phenyl)silyl)benzene (**11**)

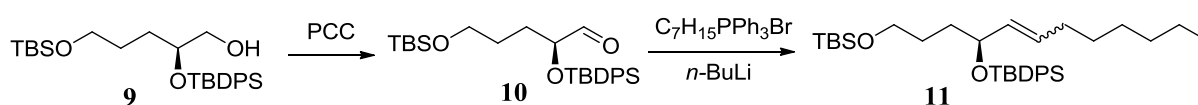

To a solution of PCC (630 mg, 3 mmol) in dry  $\text{CH}_2\text{Cl}_2$  (30 mL), **9** (709 mg, 1.5 mmol) in  $\text{CH}_2\text{Cl}_2$  (10 mL) was added slowly and stirred at rt for 2 h. Purification by FC (1% AcOEt in PE) afforded the aldehyde (664 mg, 94%), which was directly used for the next reaction step. To a solution of *n*-heptylidenetriphenylphosphonium bromide (950 mg, 2.1 mmol) in THF (20 mL) at  $-40$  °C, *n*-BuLi (1.0 mL, 2.2 M in hexane, 2.2 mm) was slowly added. The orange colored solution was stirred for 1 h, then aldehyde **10** in THF (5 mL) was added. The mixture was allowed to stir at rt for 12 h and quenched with aqueous  $\text{NH}_4\text{Cl}$ . Ether was added, and the mixture was washed with brine, dried with  $\text{Na}_2\text{SO}_4$  and concentrated in vacuo. Chromatography of the residue (1% AcOEt in PE) afforded **11** (585 mg, 75%) as a colorless oil.  $[\alpha]_{\text{D}}^{20} +10.8$  ( $c$  1.1,  $\text{CHCl}_3$ ); IR (film, KBr)  $\nu_{\text{max}}$ : 2952, 1461, 1427, 1253, 1105, 836  $\text{cm}^{-1}$ ;  $^1\text{H}$  NMR (400 MHz,  $\text{CDCl}_3$ ):

$\delta$  7.68–7.64 (m, 4H), 7.41–7.32 (m, 6H), 5.42–5.34 (m, 1H), 5.21–5.18 (m, 1H), 4.43–4.41 (m, 1H), 3.52–3.48 (m, 2H), 2.04–2.00 (m, 2H), 1.58–1.05 (m, 12H), 1.04 (s, 9H), 0.87 (s, 9H), 0.85 (t,  $J = 7.2$  Hz, 3H), 0.05 (s, 6H);  $^{13}\text{C}$  NMR (100 MHz,  $\text{CDCl}_3$ ):  $\delta$  136.0, 135.9, 134.6, 134.5, 132.7, 129.9, 129.4, 129.3, 127.4, 127.3, 69.4, 63.3, 34.7, 31.8, 29.8, 29.0, 28.3, 27.2, 27.02, 25.98, 22.7, 19.3, 18.3, 14.0,  $-5.3$ ; EIMS ( $m/z$ ): 441, 415, 309, 283, 253, 235, 199, 181, 159, 135, 115, 91, 73; HRMS–ESI: Calcd for  $\text{C}_{34}\text{H}_{56}\text{O}_2\text{Si}_2$ : 575.3717  $[\text{M} + \text{Na}]^+$ . Found: 575.3717.

### Synthesis of (*S*)-4-(*tert*-butyldiphenylsilyloxy)dodec-5-en-1-ol (**12**)

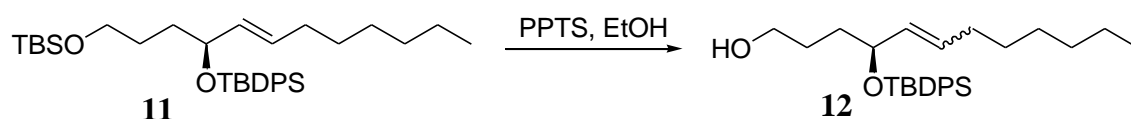

A solution of **11** (420 mg, 0.76 mmol), pyridinium *p*-toluenesulfonate (95 mg, 0.38 mmol) in absolute EtOH (10 mL) was stirred at rt for 24 h. Purification by flash chromatography ( $\text{CH}_2\text{Cl}_2$ ) of the residue obtained after removal of the solvent afforded **12** (326 mg, 98%) as a colorless oil.  $[\alpha]_{\text{D}}^{20} +10.5$  (c 0.55,  $\text{CHCl}_3$ ); IR (film, KBr)  $\nu_{\text{max}}$ : 3347, 2933, 1471, 1427, 1107, 1056, 821  $\text{cm}^{-1}$ ;  $^1\text{H}$  NMR (400 MHz,  $\text{CDCl}_3$ ):  $\delta$  7.67 (t,  $J = 8.4$  Hz, 4H), 7.44–7.32 (m, 6H), 5.46–5.41 (m, 1H), 5.37–5.18 (m, 1H), 4.49–4.45 (m, 1H), 3.55–3.51 (m, 2H), 1.87–1.49 (m, 6H), 1.25–1.05 (m, 8H), 1.04 (s, 9H), 0.85 (t,  $J = 7.2$  Hz, 3H);  $^{13}\text{C}$  NMR (100 MHz,  $\text{CDCl}_3$ ):  $\delta$  136.1, 136.0, 134.4, 134.1, 132.3, 130.2, 129.6, 129.5, 127.5, 127.3, 69.3, 63.0, 34.7, 31.7, 29.4, 29.0, 28.1, 27.6, 27.0, 22.6, 19.3, 14.0; EIMS ( $m/z$ ): 381, 339, 303, 269, 254, 199, 181, 165, 139, 123, 81; HRMS–ESI: Calcd for  $\text{C}_{28}\text{H}_{42}\text{O}_2\text{Si}$ : 461.2852  $[\text{M} + \text{Na}]^+$ . Found: 461.2853.

## Synthesis of (5-carboxypentyl)triphenylphosphonium bromide (**15**)

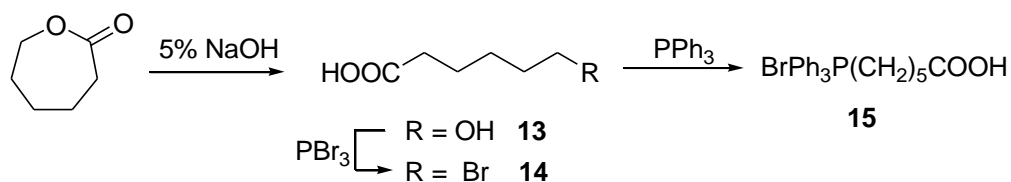

A solution of  $\epsilon$ -caprolactone (1.14 g, 10 mmol) in 5% NaOH (50 mL) was stirred at rt for 12 h. The solution was cooled in an ice bath and acidified with 10% HCl. The aqueous phase was extracted with Et<sub>2</sub>O three times. The extracts were washed with brine, dried (Na<sub>2</sub>SO<sub>4</sub>), concentrated in vacuo to give crude product **13** (1.34 g, 100%), which was directly used for next step. To a solution of **13** (1.34 g, 10 mmol) in CH<sub>2</sub>Cl<sub>2</sub> (30 mL), PBr<sub>3</sub> (0.8 mL, 8.4 mmol) in CH<sub>2</sub>Cl<sub>2</sub> (10 mL) was added dropwise at 0 °C. The reaction mixture was warmed to 40 °C and stirred for 5 h. The mixture was cooled to rt, then poured into ice water and extracted with CH<sub>2</sub>Cl<sub>2</sub> (50 mL). The extracts were washed (brine), dried and concentrated in vacuo to afford crude compound **14** (1.6 g, 82%). A solution of **14** and PPh<sub>3</sub> in CH<sub>3</sub>CN was refluxed under N<sub>2</sub> for 12 h. After removal of the solvent, the residue was washed with Et<sub>2</sub>O to give **15** as a white solid (3.6 g, 98%) [4,5]. <sup>1</sup>H NMR (400 MHz, D<sub>2</sub>O):  $\delta$  7.71–7.53 (m, 15H), 3.18–3.10 (m, 2H), 2.17 (t,  $J = 7.2$  Hz, 3H), 1.57–1.36 (m, 6H); <sup>13</sup>C NMR (100 MHz, D<sub>2</sub>O):  $\delta$  178.5, 134.9, 133.5, 133.4, 130.0, 128.9, 118.5, 117.7, 33.3, 29.2, 29.0, 23.4, 21.4, 21.3, 20.9.

## Synthesis of (S)-10-(*tert*-butyldiphenylsilyloxy)octadeca-6,11-dienoic acid (**17**)

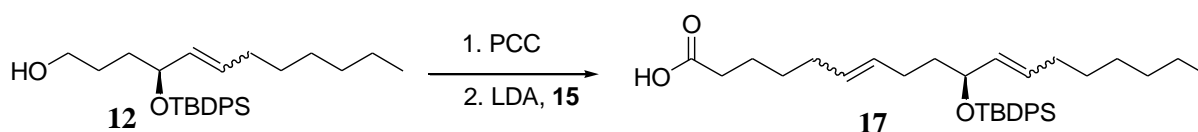

To a solution of PCC (210 mg, 1 mmol) in dry CH<sub>2</sub>Cl<sub>2</sub> (10 mL), **12** (230 mg, 0.52 mmol) in CH<sub>2</sub>Cl<sub>2</sub> (2 mL) was slowly added and stirred at rt for 4 h. Purification by



flash chromatography (5% AcOEt in PE) afforded the aldehyde (220 mg, 96%), which was used for the next reaction step without further purification.

A stirred solution of diisopropylamine (0.29 mL, 2 mmol) in dry THF (2 mL) was treated under N<sub>2</sub> at -30 °C with *n*-butyllithium (0.91 mL, 2.2 M in hexane). The solution was stirred at -30 °C for 30 min and was added to a suspension of **15** (456 mg, 1 mmol) in dry THF (20 mL). The blood-red solution was stirred for 30 min at rt and treated dropwise with a solution of the above aldehyde in dry THF (2 mL). The mixture was stirred for 3 h. An ice-cold 10% solution of NaHSO<sub>4</sub> (20 mL) was added, and the aqueous phase was extracted with AcOEt. The extracts were washed with brine, dried (Na<sub>2</sub>SO<sub>4</sub>) and concentrated in vacuo. Column chromatography (50% AcOEt in PE) of the residue afforded acid **17** (192 mg, 72%) as a colorless oil.  $[\alpha]_D^{20} +8.7$  (c 0.69, CHCl<sub>3</sub>); IR (film, KBr)  $\nu_{\max}$ : 3005, 2925, 2853, 1711, 1461, 1427, 1289, 1069, 1109, 823 cm<sup>-1</sup>; <sup>1</sup>H NMR (400 MHz, CDCl<sub>3</sub>):  $\delta$  7.67 (t, *J* = 8.0 Hz, 4H), 7.44–7.32 (m, 6H), 5.42–5.36 (m, 1H), 5.32–5.17 (m, 3H), 4.47–4.43 (m, 1H), 2.33 (t, *J* = 7.6 Hz, 2H), 1.97–1.92 (m, 4H), 1.62–1.05 (m, 16H), 1.03 (s, 9H), 0.85 (t, *J* = 7.2 Hz, 3H); <sup>13</sup>C NMR (100 MHz, CDCl<sub>3</sub>):  $\delta$  178.6, 136.1, 136.0, 134.6, 134.4, 132.6, 130.2, 130.1, 129.5, 129.5, 129.4, 127.4, 127.3, 69.4, 38.5, 33.7, 31.7, 29.4, 29.0, 29.0, 27.6, 27.1, 27.0, 24.3, 22.9, 22.6, 19.3, 14.1; HRMS–ESI: Calcd for C<sub>34</sub>H<sub>50</sub>O<sub>3</sub>Si: 533.3451 [M - H]<sup>-</sup>. Found: 533.3453.

Synthesis of (S)-10-(*tert*-butyldiphenylsilyloxy)-*N*-phenethyloctadeca-6,11-dienamide (**18**)

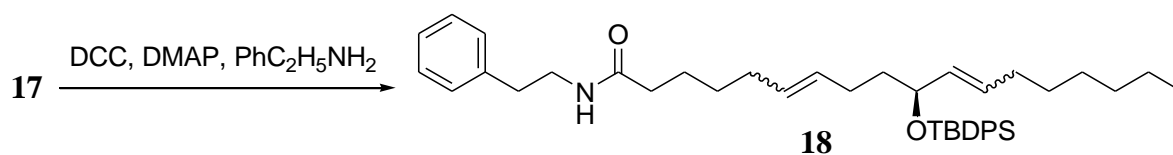

A solution of **17** (150 mg, 0.28 mmol), 2-phenylethylamine (34 mg, 0.28 mmol), DCC (58 mg, 0.28 mmol) and DMAP (20 mg) in CH<sub>2</sub>Cl<sub>2</sub> (10mL) was stirred for 24 h. The precipitated solid was removed by filtration, the filtrate washed with aqueous HCl (2 N), water and brine, and dried (Na<sub>2</sub>SO<sub>4</sub>). Solvent removal followed by column chromatography of the residue (10% AcOEt in PE) gave the amide (143 mg, 80%) as a colorless oil.  $[\alpha]_D^{20} +9.9$  (c 0.39, CHCl<sub>3</sub>); <sup>1</sup>H NMR (400 MHz, CDCl<sub>3</sub>):  $\delta$  7.67 (t, *J* = 6.4 Hz, 4H), 7.40–7.17 (m, 11H), 5.45–5.37 (m, 2H), 5.26–5.21 (m, 3H), 4.43 (m, 1H), 3.51 (q, *J* = 6.4 Hz, 2H), 2.80 (t, *J* = 7.2 Hz, 2H), 2.09 (t, *J* = 7.6 Hz, 2H), 1.97–1.92 (m, 4H), 1.61–1.05 (m, 16H), 1.03 (s, 9H), 0.85 (t, *J* = 7.2 Hz, 3H); <sup>13</sup>C NMR (100 MHz, CDCl<sub>3</sub>):  $\delta$  172.9, 138.9, 136.0, 135.9, 134.6, 134.4, 132.6, 130.2, 129.9, 129.5, 129.4, 129.3, 128.8, 128.7, 127.5, 127.3, 126.5, 69.4, 40.5, 38.6, 36.7, 35.8, 31.7, 29.4, 29.3, 29.0, 27.6, 27.1, 27.0, 26.9, 25.4, 22.9, 22.6, 19.3, 14.1; HRMS–ESI: Calcd for C<sub>42</sub>H<sub>59</sub>NO<sub>2</sub>Si: 636.4237 [M - H]<sup>-</sup>. Found: 636.4208.

## Synthesis of (*R*)-10-(*tert*-butyldiphenylsilyloxy)-*N*-phenethyloctadecanamide (**19**)

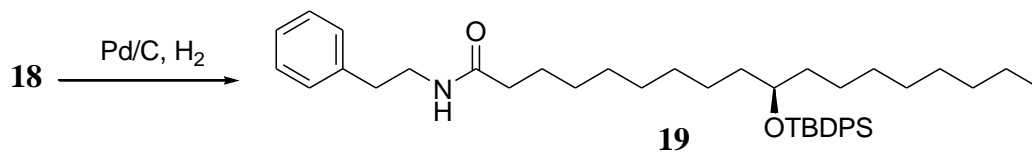

To a solution of the amide **18** (50 mg, 0.078 mmol) in MeOH (20 mL), 10% Pd/C (10 mg) was added and the mixture was hydrogenated for 24 h. It was then filtered through a short pad of Celite and the filter cake was washed with MeOH. The filtrate were concentrated in vacuo to give the product (50 mg, 100%) as a colorless oil.  $^1\text{H}$  NMR (400 MHz,  $\text{CDCl}_3$ ):  $\delta$  7.67 (d,  $J = 6.8$  Hz, 4H), 7.42–7.18 (m, 11H), 5.46 (br s, 1H), 3.70 (m, 1H), 3.51 (q,  $J = 6.4$  Hz, 2H), 2.81 (t,  $J = 7.2$  Hz, 2H), 2.10 (t,  $J = 7.6$  Hz, 2H), 1.58–1.05 (m, 24H), 1.03 (s, 9H), 0.87 (t,  $J = 6.8$  Hz, 3H).  $^{13}\text{C}$  NMR (100 MHz,  $\text{CDCl}_3$ ):  $\delta$  173.2, 139.0, 136.0, 134.9, 129.4, 128.8, 128.6, 127.4, 126.5, 73.3, 40.5, 36.9, 36.4, 31.9, 29.7, 29.7, 29.5, 29.4, 29.3, 29.3, 27.1, 25.8, 24.9, 22.7, 19.4, 14.1; HRMS–ESI: Calcd for  $\text{C}_{42}\text{H}_{63}\text{NO}_2\text{Si}$ : 640.4550  $[\text{M} - \text{H}]^-$ . Found: 640.4527.

## Synthesis of (*R*)-10-hydroxy-*N*-phenethyloctadecanamide (**1**)

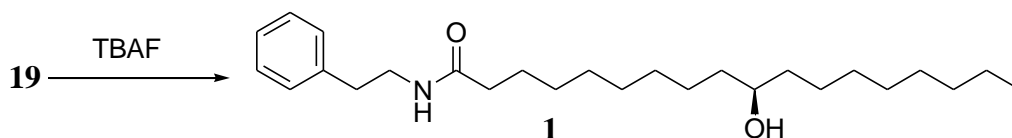

A solution of **19** (50 mg, 0.078 mmol) and TBAF (42 mg, 0.16 mmol) in THF (10 mL) was stirred for 24 h. After removal of the solvent, the residue was purified by flash chromatography (30 % EtOAc in PE) to afford (*R*)-**1** (29 mg, 93%) as a white solid. Mp 106–107 °C;  $[\alpha]_{\text{D}}^{20}$  +37.2 ( $c$  0.85,  $\text{CHCl}_3$ ); IR (KBr)  $\nu_{\text{max}}$ : 3312, 2920, 2846, 1643, 1554  $\text{cm}^{-1}$ ;  $^1\text{H}$  NMR (400 MHz,  $\text{CDCl}_3$ ):  $\delta$  7.32 (t,  $J = 7.6$  Hz, 2H), 7.22 (d,  $J = 7.6$  Hz, 1H), 7.19 (t,  $J = 7.6$  Hz, 2H), 5.39 (br s, 1H), 3.58 (br m, 1H), 3.52 (q,  $J = 6.4$  Hz, 2H),

2.82 (t,  $J = 6.8$  Hz, 2H), 2.11 (t,  $J = 7.2$  Hz, 2H), 1.58–1.05 (m, 24H), 0.88 (t,  $J = 6.8$  Hz, 3H);  $^{13}\text{C}$  NMR (100 MHz,  $\text{CDCl}_3$ ):  $\delta$  173.1, 139.0, 128.8, 128.6, 126.5, 72.0, 40.5, 37.5, 37.5, 36.8, 35.7, 31.9, 29.7, 29.6, 29.4, 29.3, 29.2, 25.7, 25.6, 22.7, 14.1; EIMS ( $m/z$ ): 403, 385, 294, 290, 265, 176, 163, 122, 104 (base), 91, 83, 69, 55, 43; HRMS–ESI: Calcd. for  $\text{C}_{26}\text{H}_{45}\text{NO}_2$ : 404.3529  $[\text{M}+\text{H}]^+$ . Found: 404.3529.

## References

1. Civitello, E. R.; Rapoport, H. *J. Org. Chem.* **1994**, *59*, 3775–3782.
2. Liu, R.; Ma, J.; Wei, B.; Lin, G.; Huang, W. *Tetrahedron Lett.* **2009**, *50*, 4046–4049.
3. Qabar, M. N.; Kahn, M. *Tetrahedron Lett.* **1996**, *37*, 965–968.
4. Sankaranarayanan, S.; Chattopadhyay, S. *Tetrahedron: Asymmetry* **1998**, *9*, 1345–1350.
5. Nanda, S.; Yadav, J. S. *Tetrahedron: Asymmetry* **2003**, *14*, 1799–1806.

# $^1\text{H}$ NMR and $^{13}\text{C}$ NMR spectra

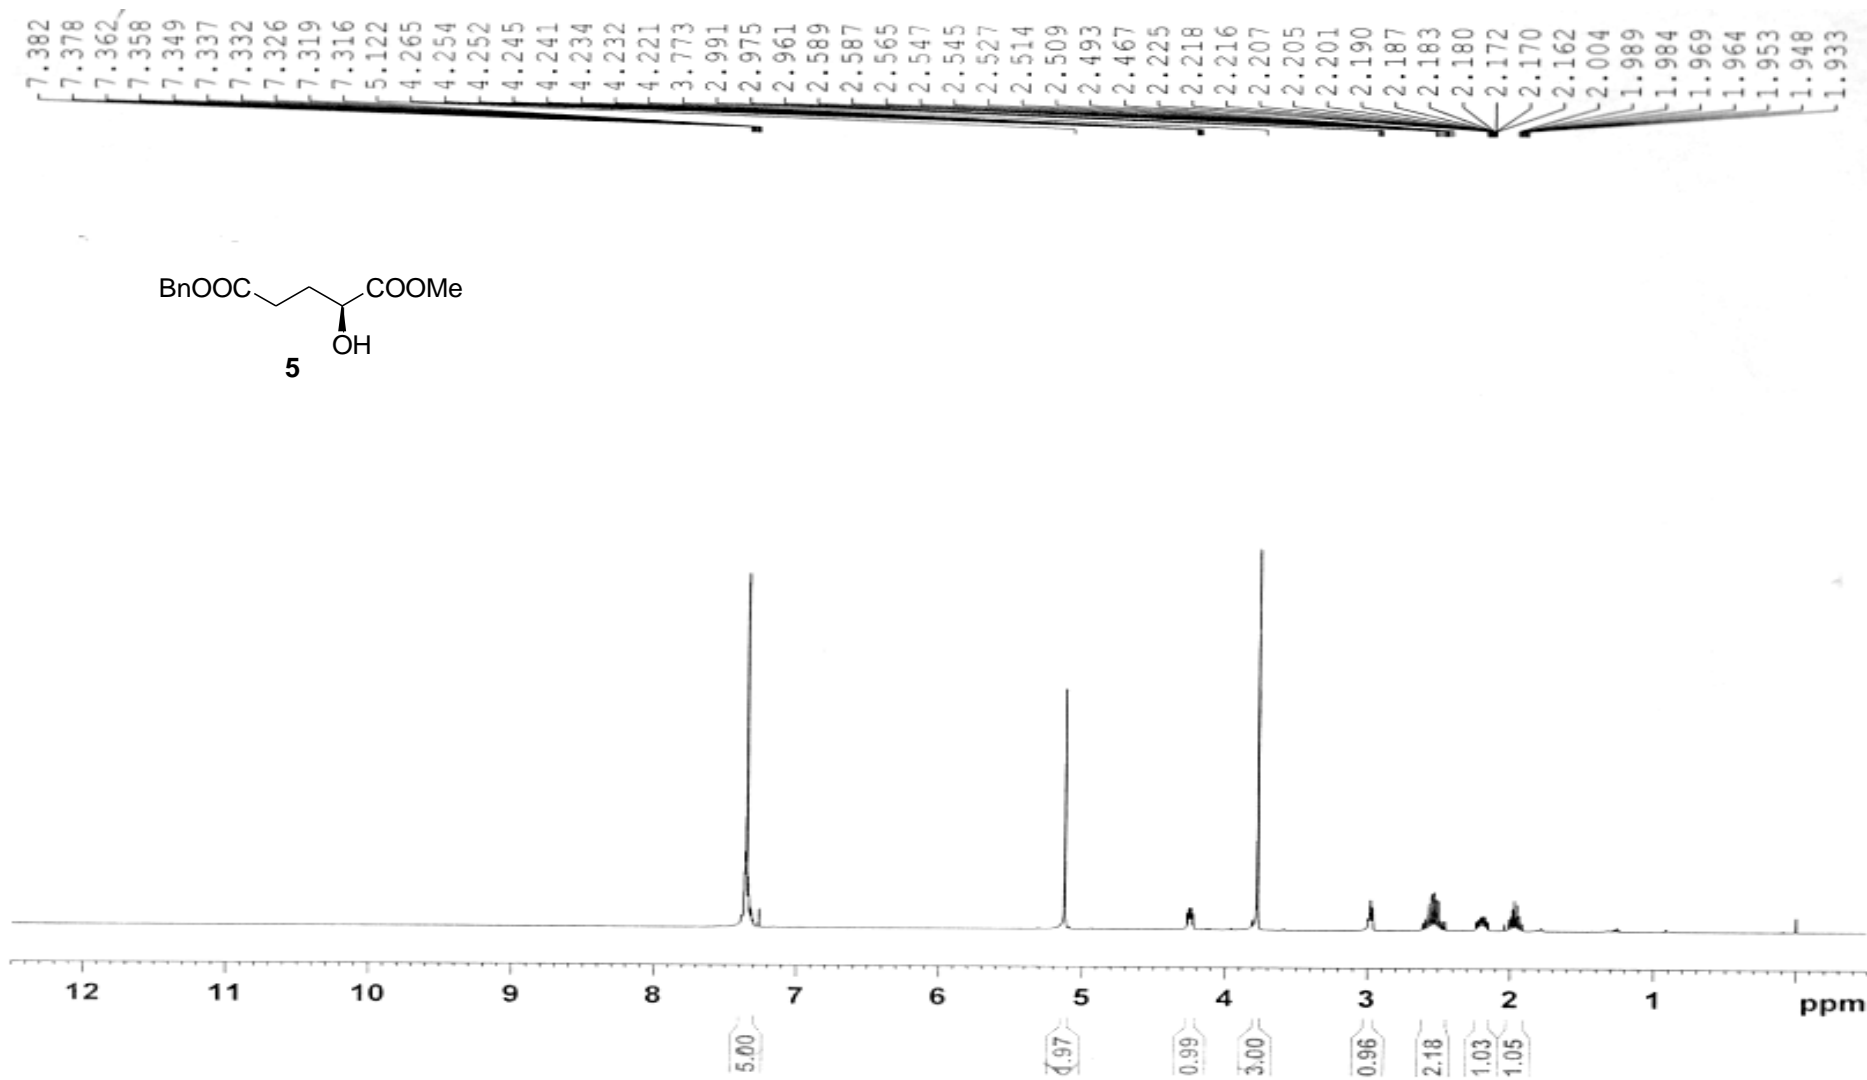

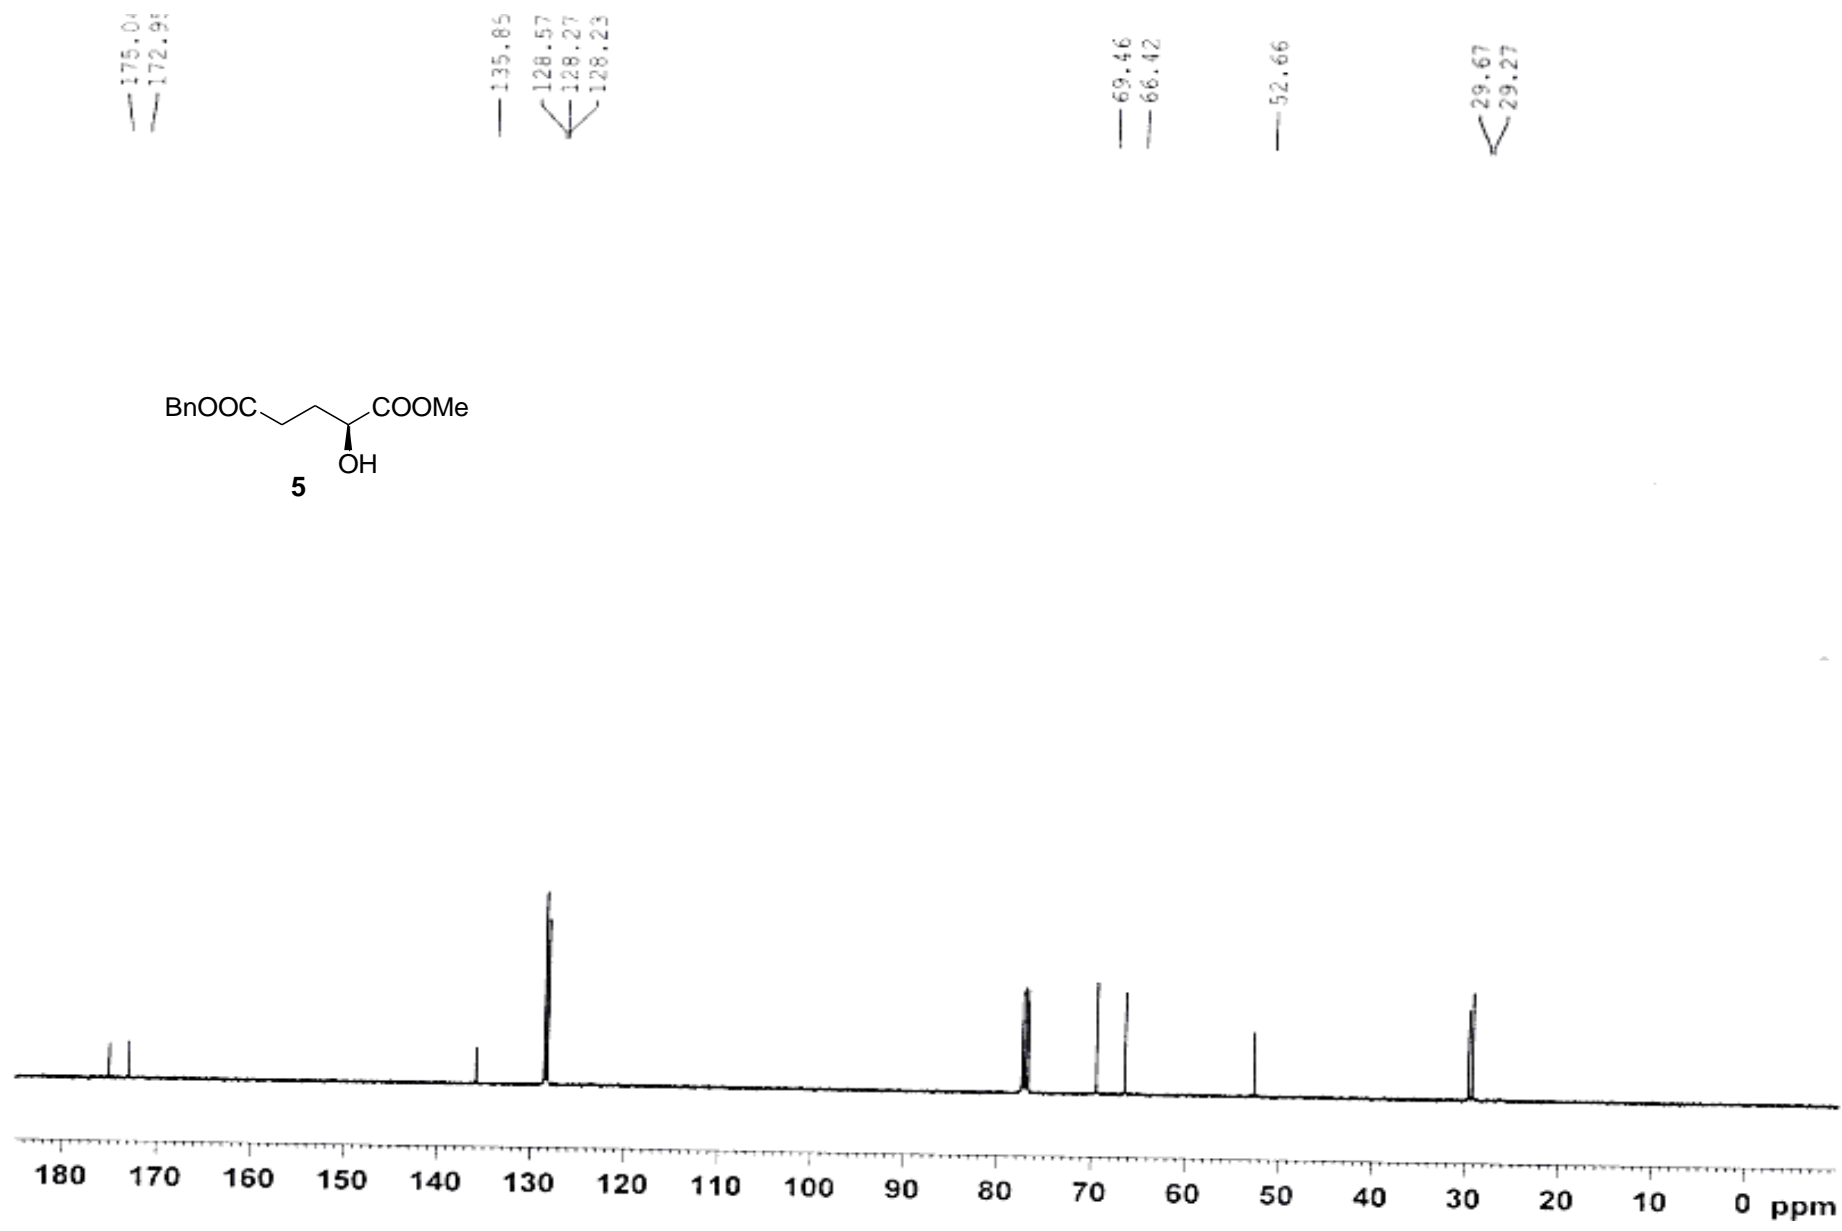

7.675  
7.671  
7.655  
7.651  
7.640  
7.635  
7.631  
7.444  
7.437  
7.430  
7.422  
7.415  
7.407  
7.404  
7.399  
7.395  
7.380  
7.377  
7.365  
7.362  
7.348  
7.345  
7.341  
4.302  
4.288  
4.275  
3.604  
3.588  
3.572  
3.485  
1.841  
1.826  
1.822  
1.819  
1.803  
1.795  
1.788  
1.784  
1.781  
1.768  
1.657  
1.652  
1.640  
1.635  
1.628  
1.619  
1.613  
1.603  
1.597  
1.580  
1.277  
1.259  
1.241  
1.102

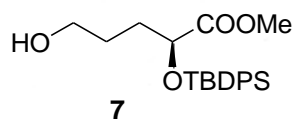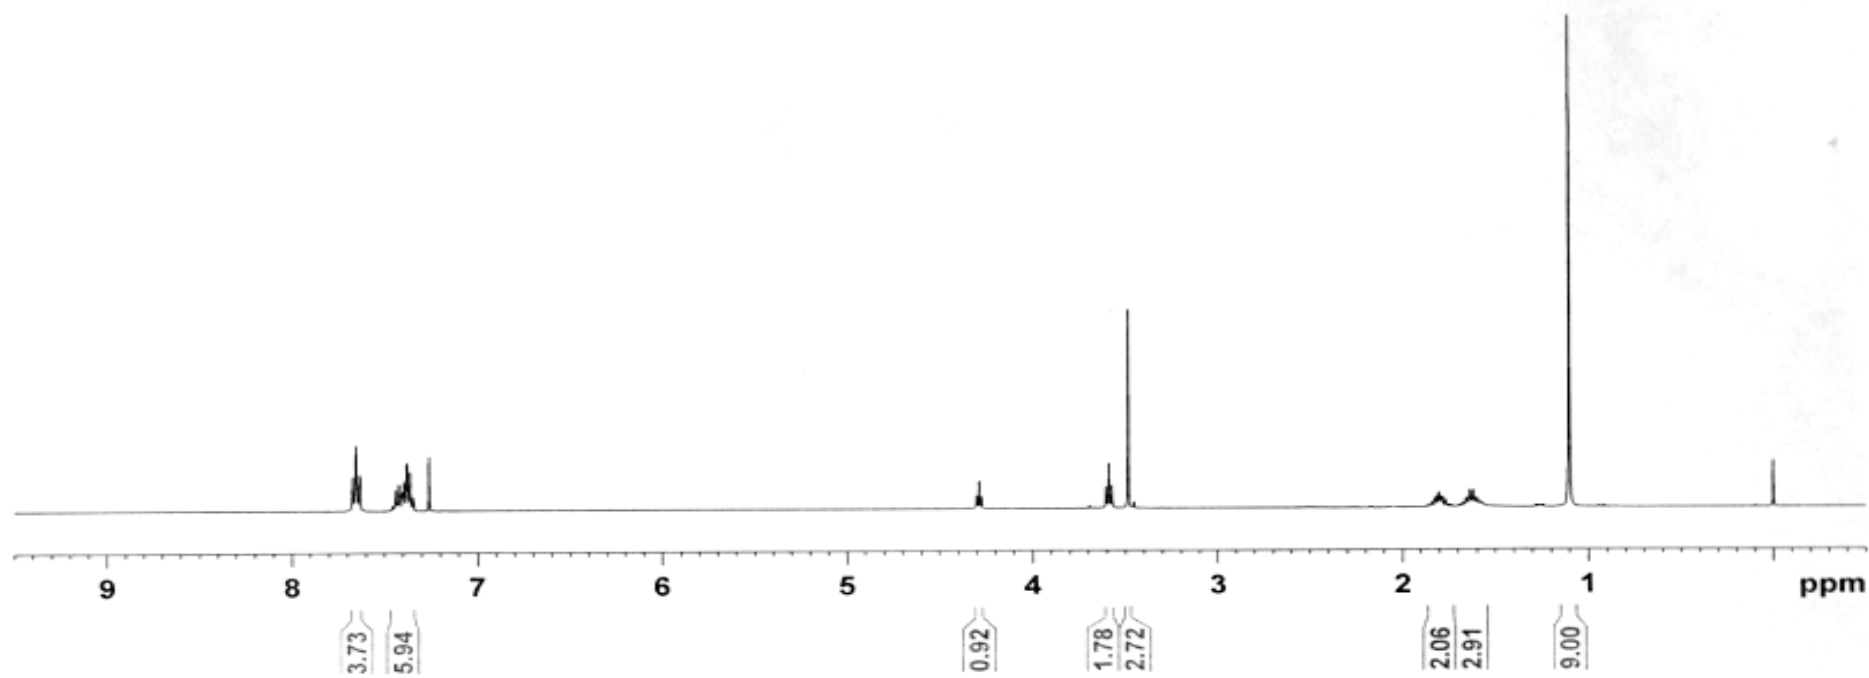

— 173.38

135.97  
135.80  
133.26  
133.00  
129.88  
129.81  
127.68  
127.54

— 72.33

— 62.53

— 51.49

— 31.48

— 27.80

— 26.89

— 19.37

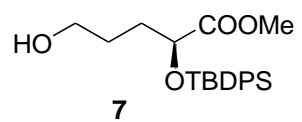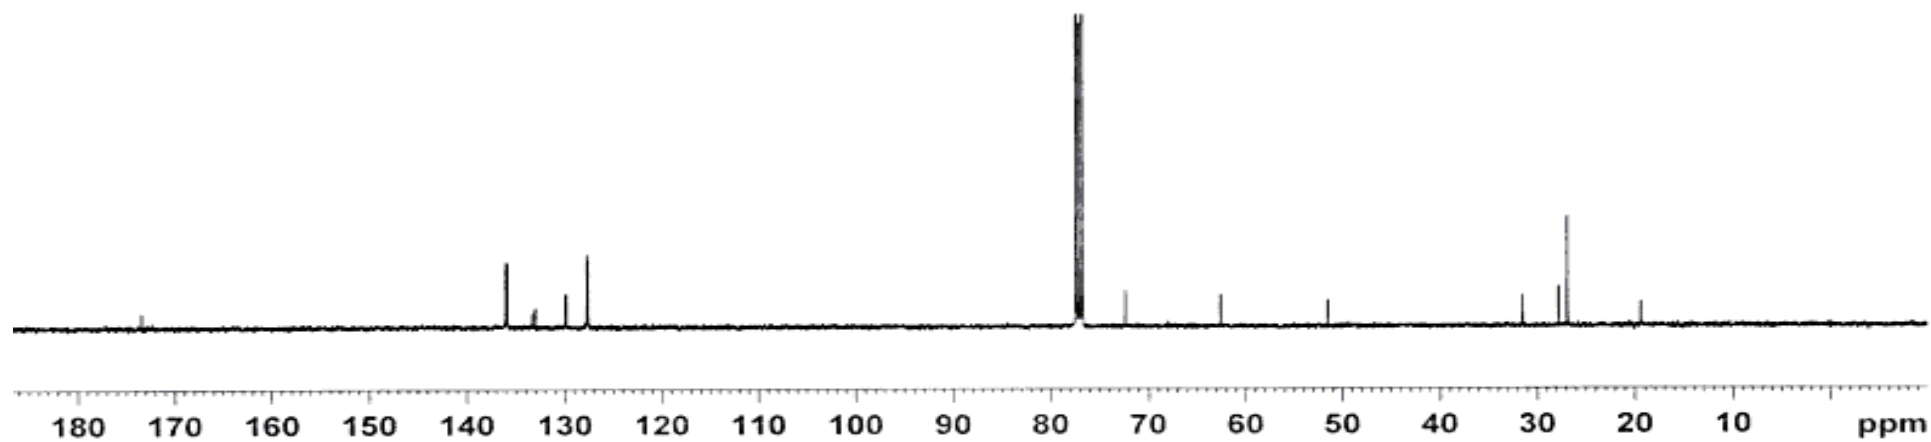



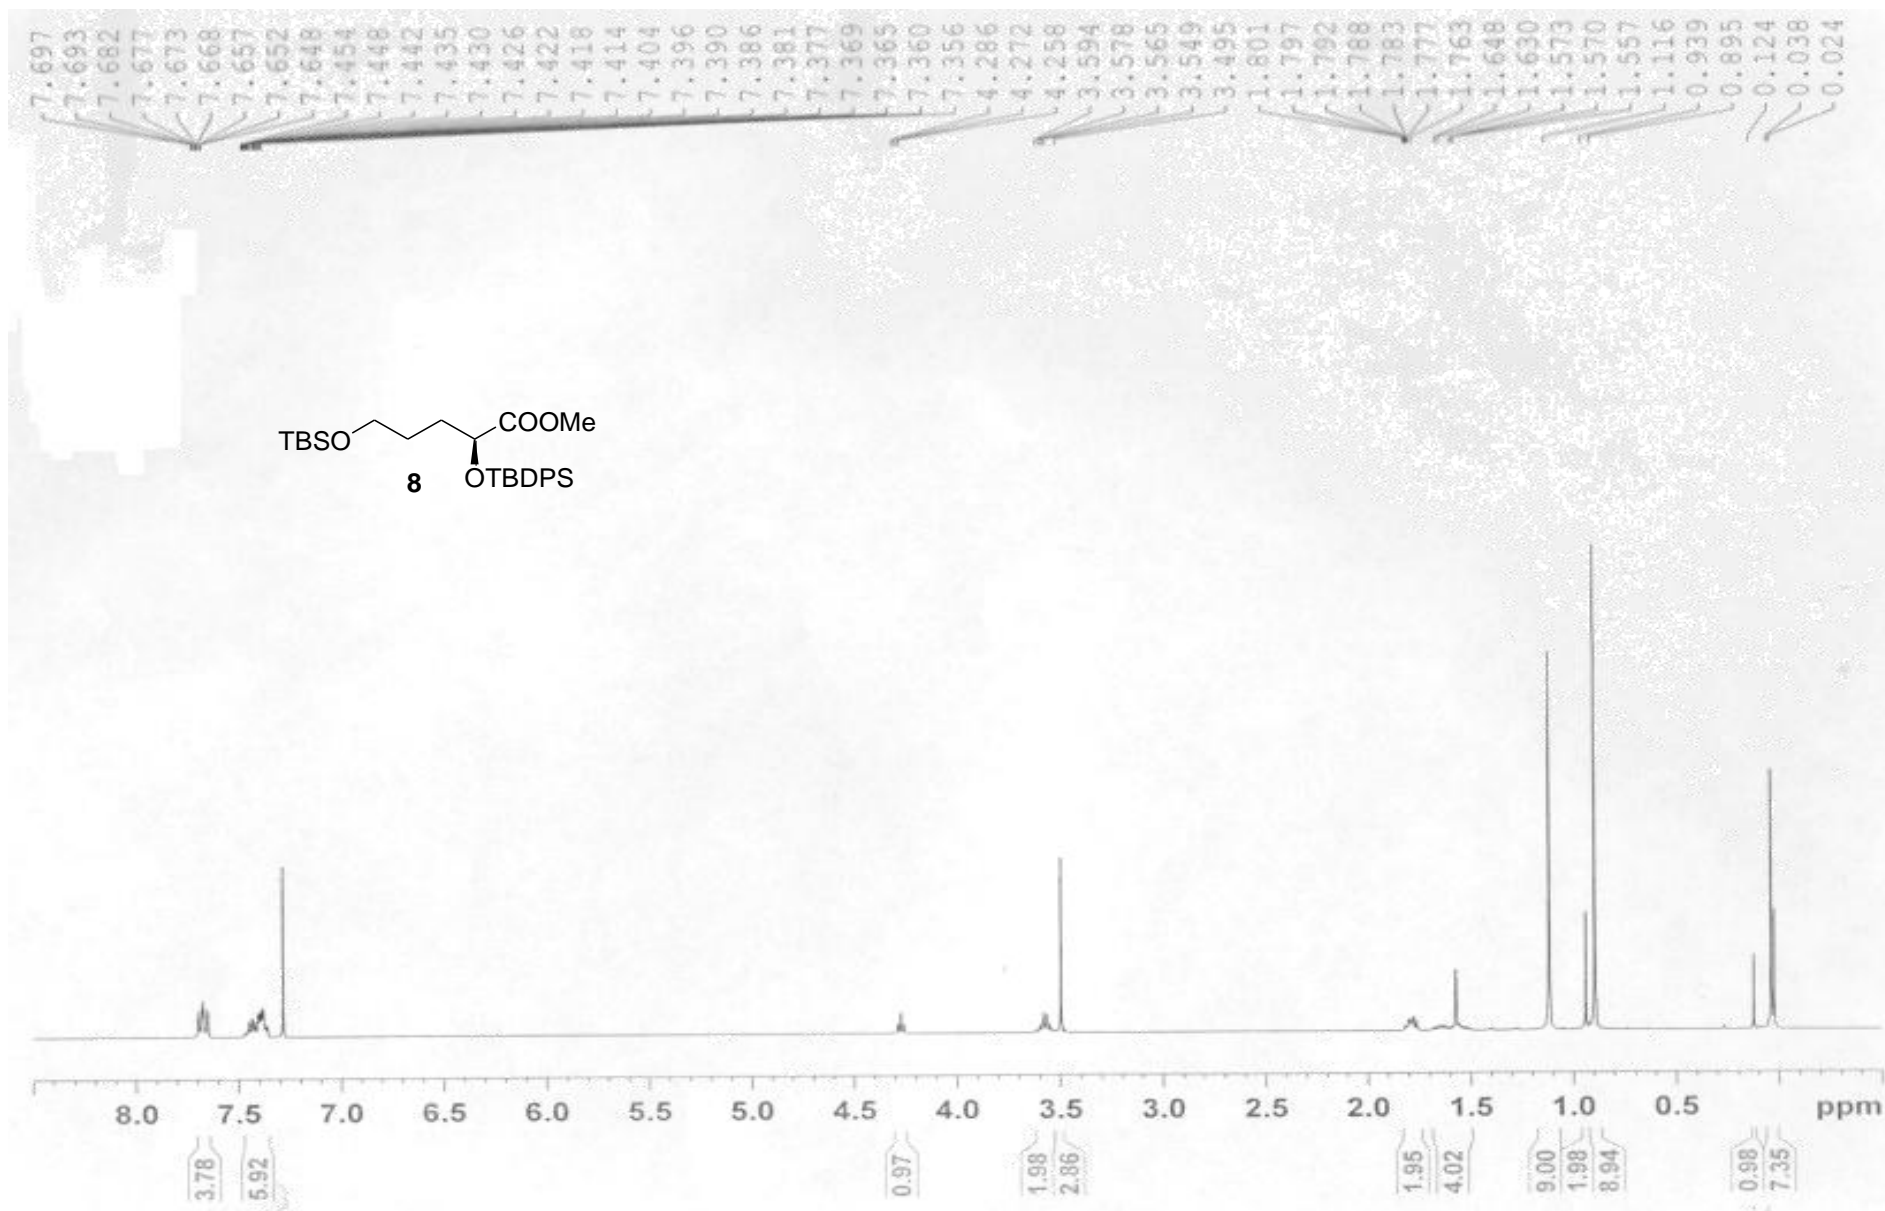

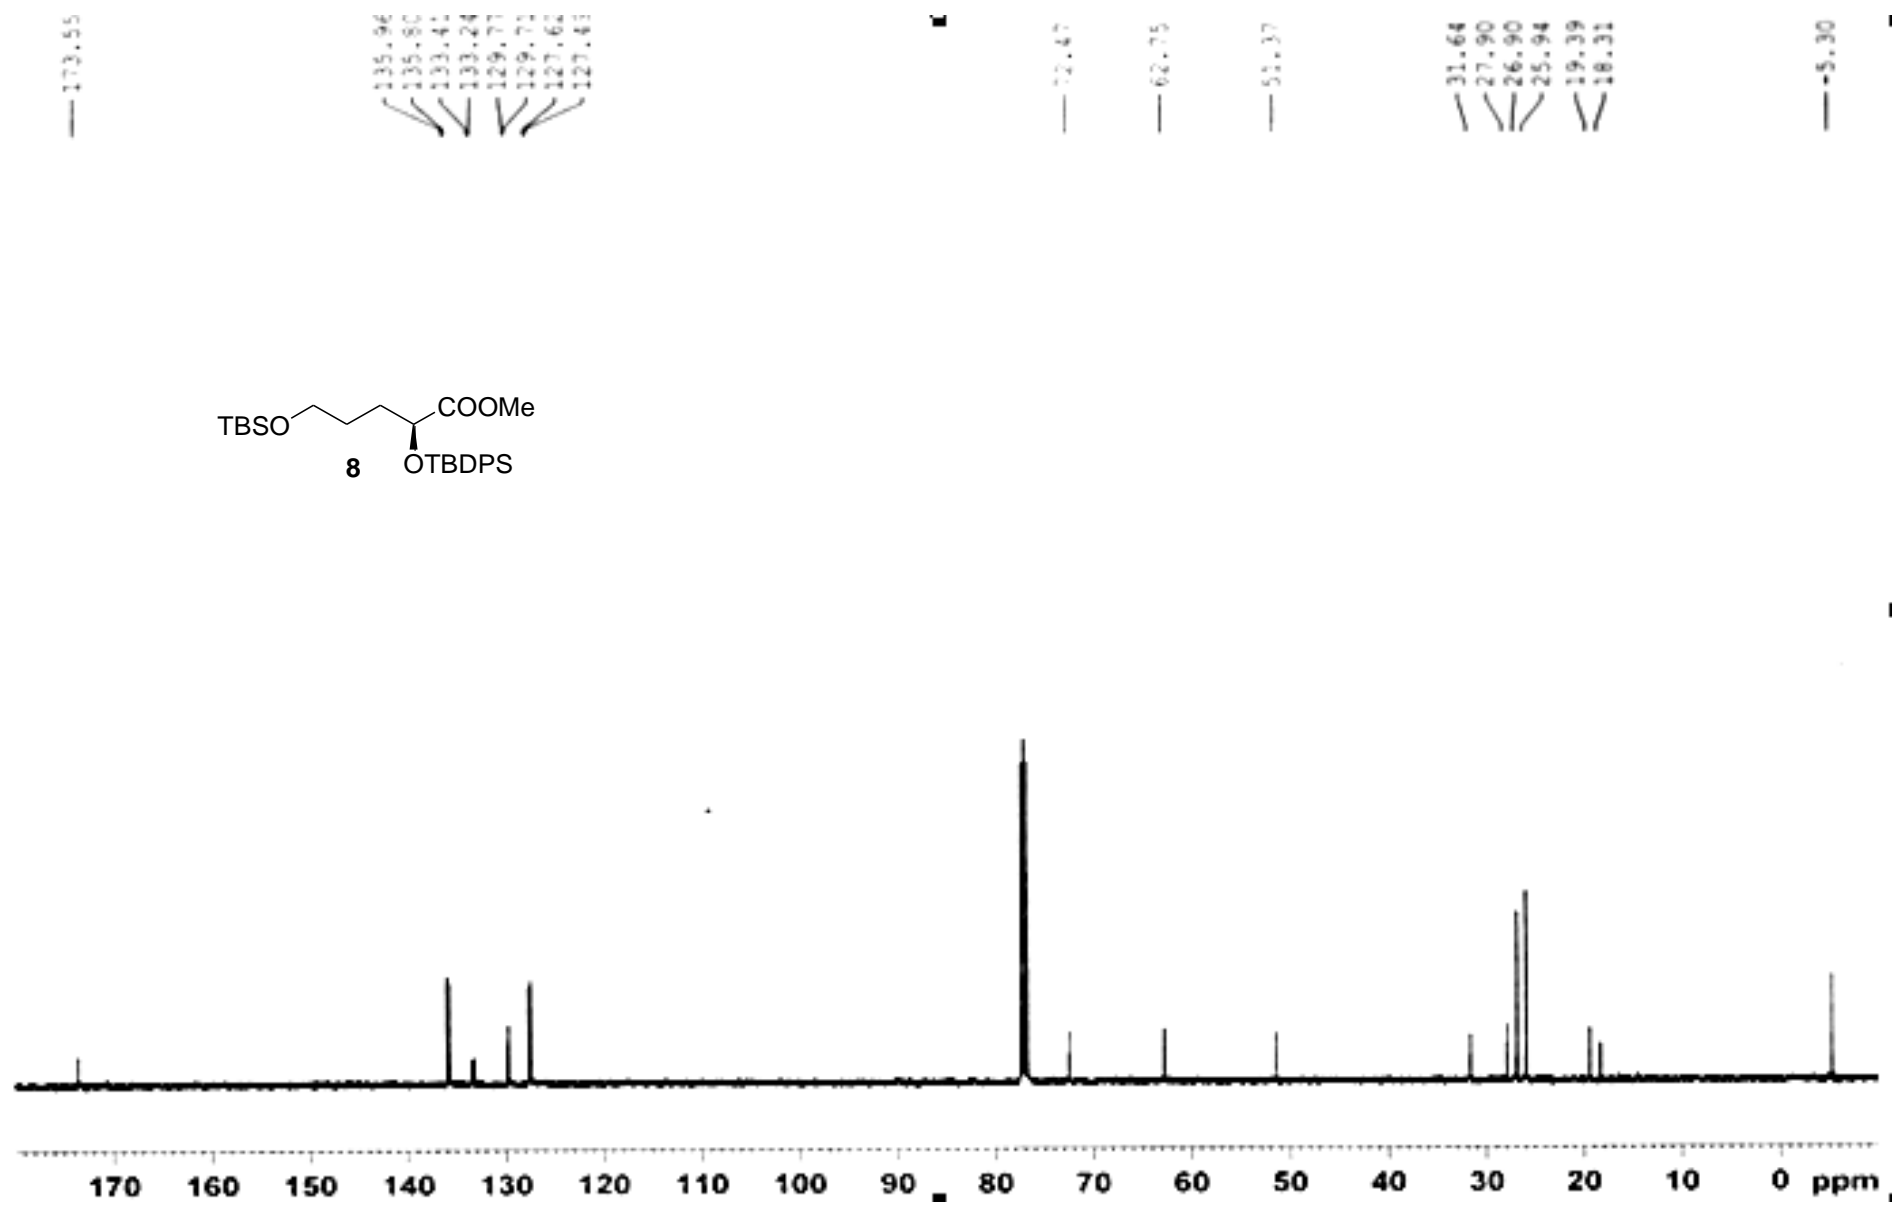



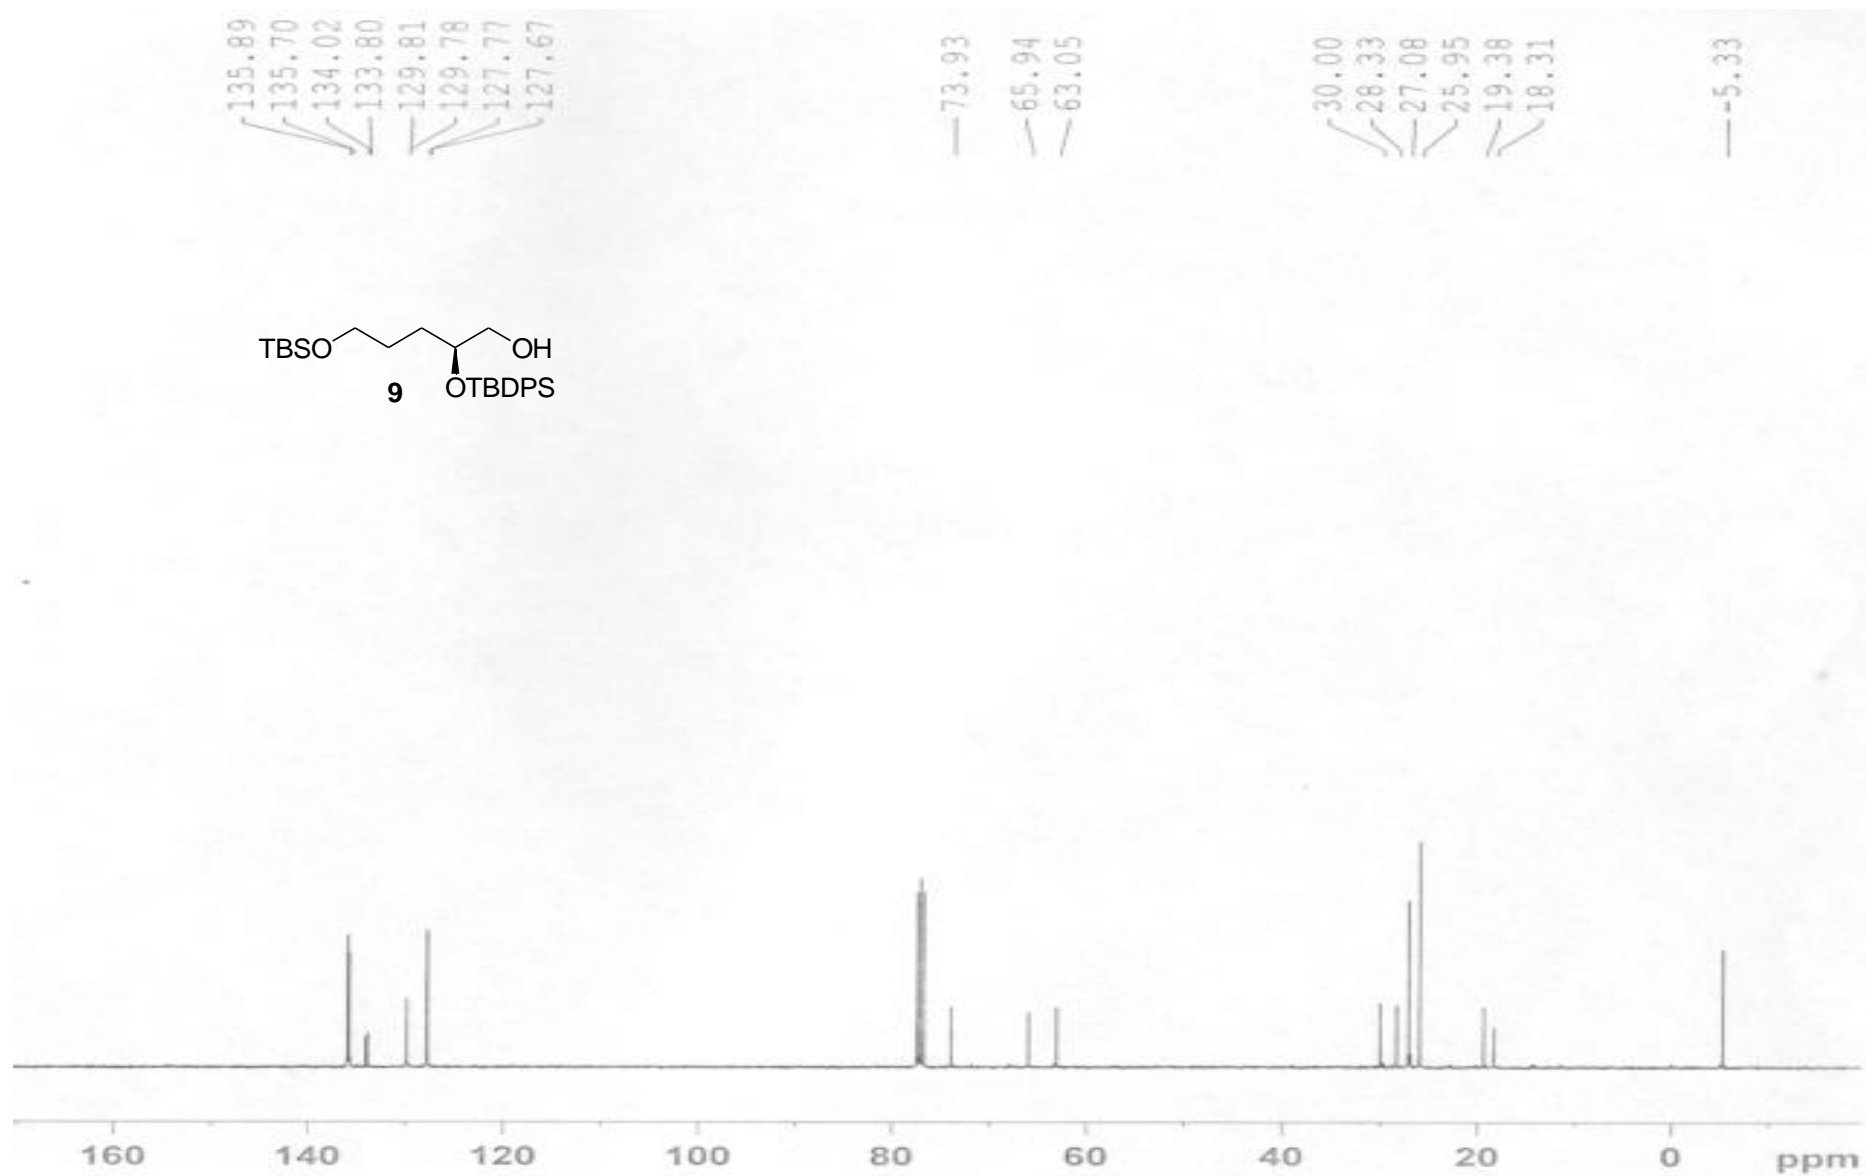

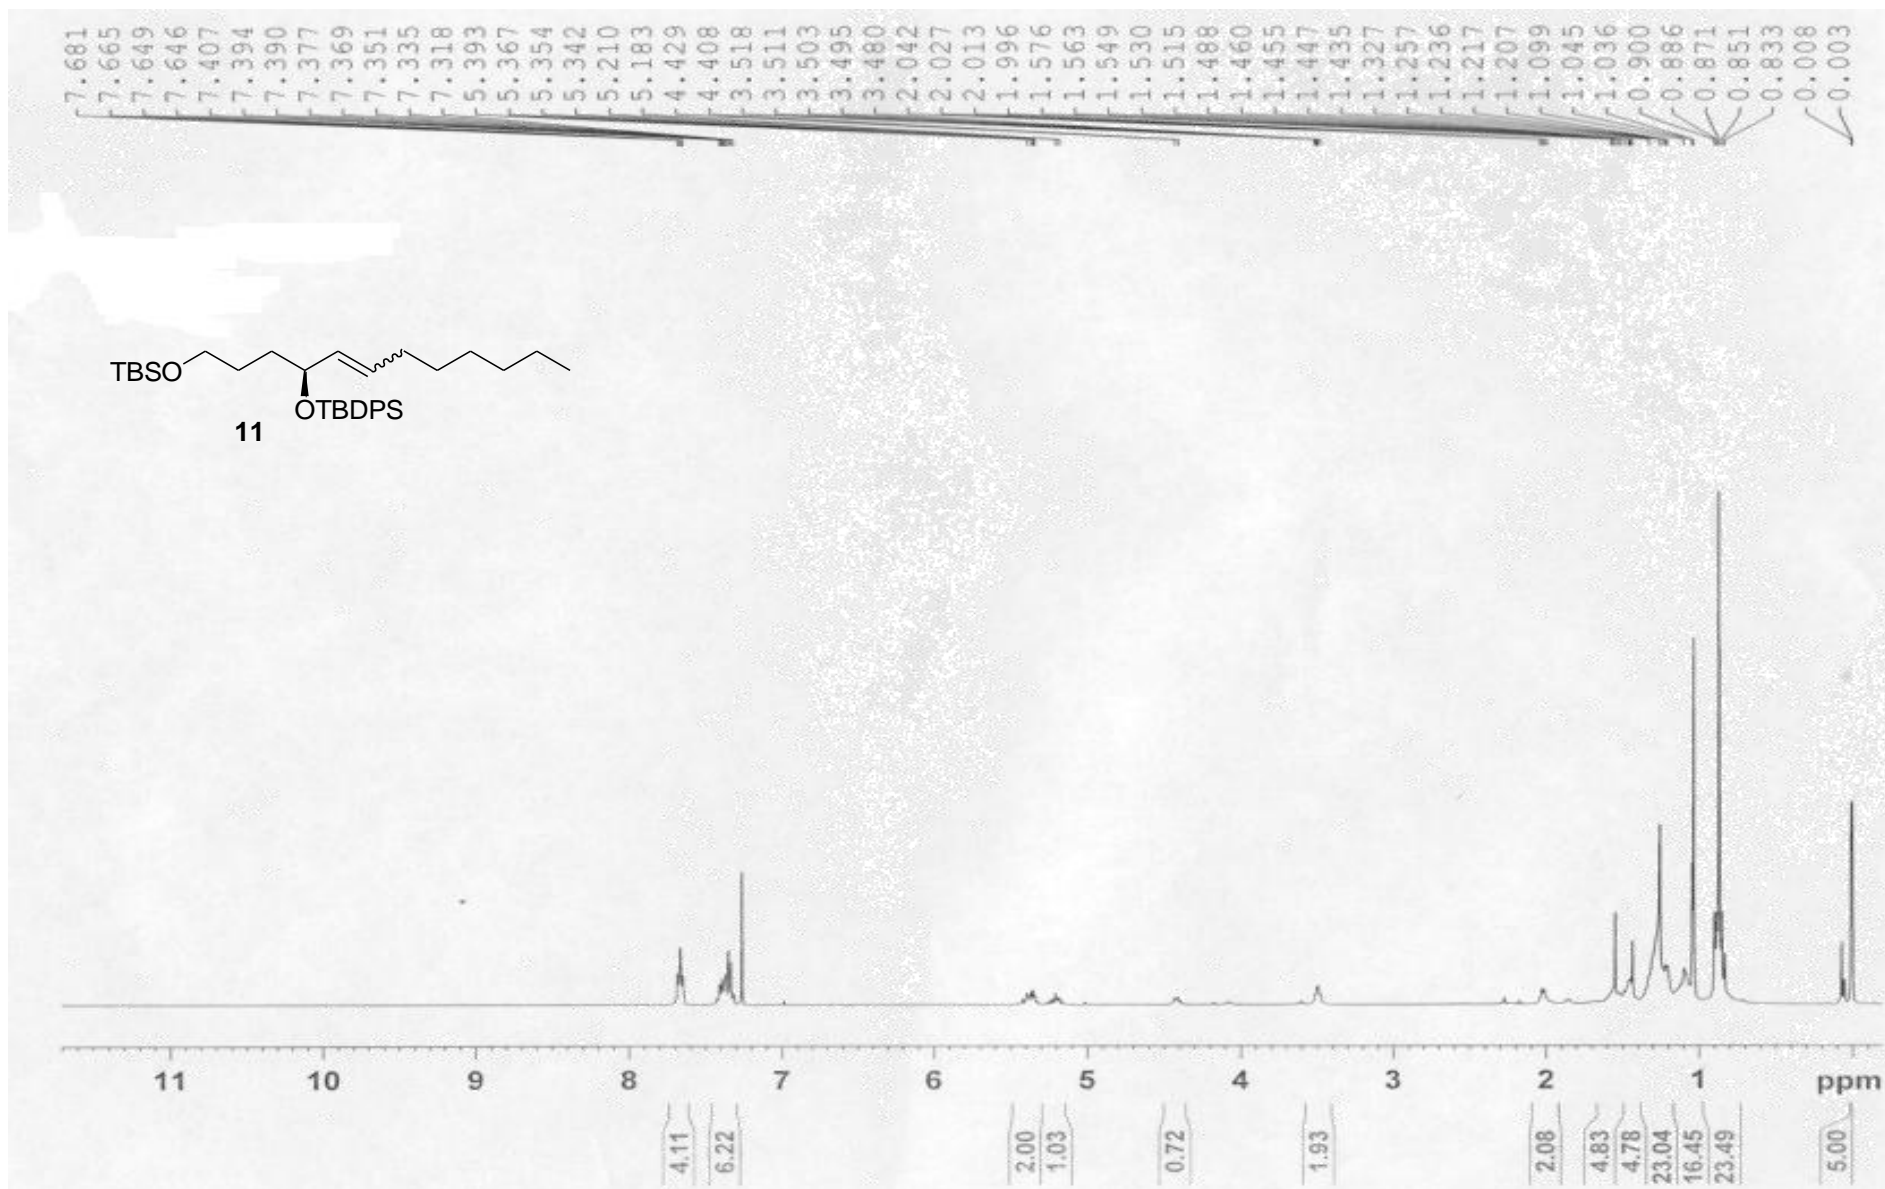



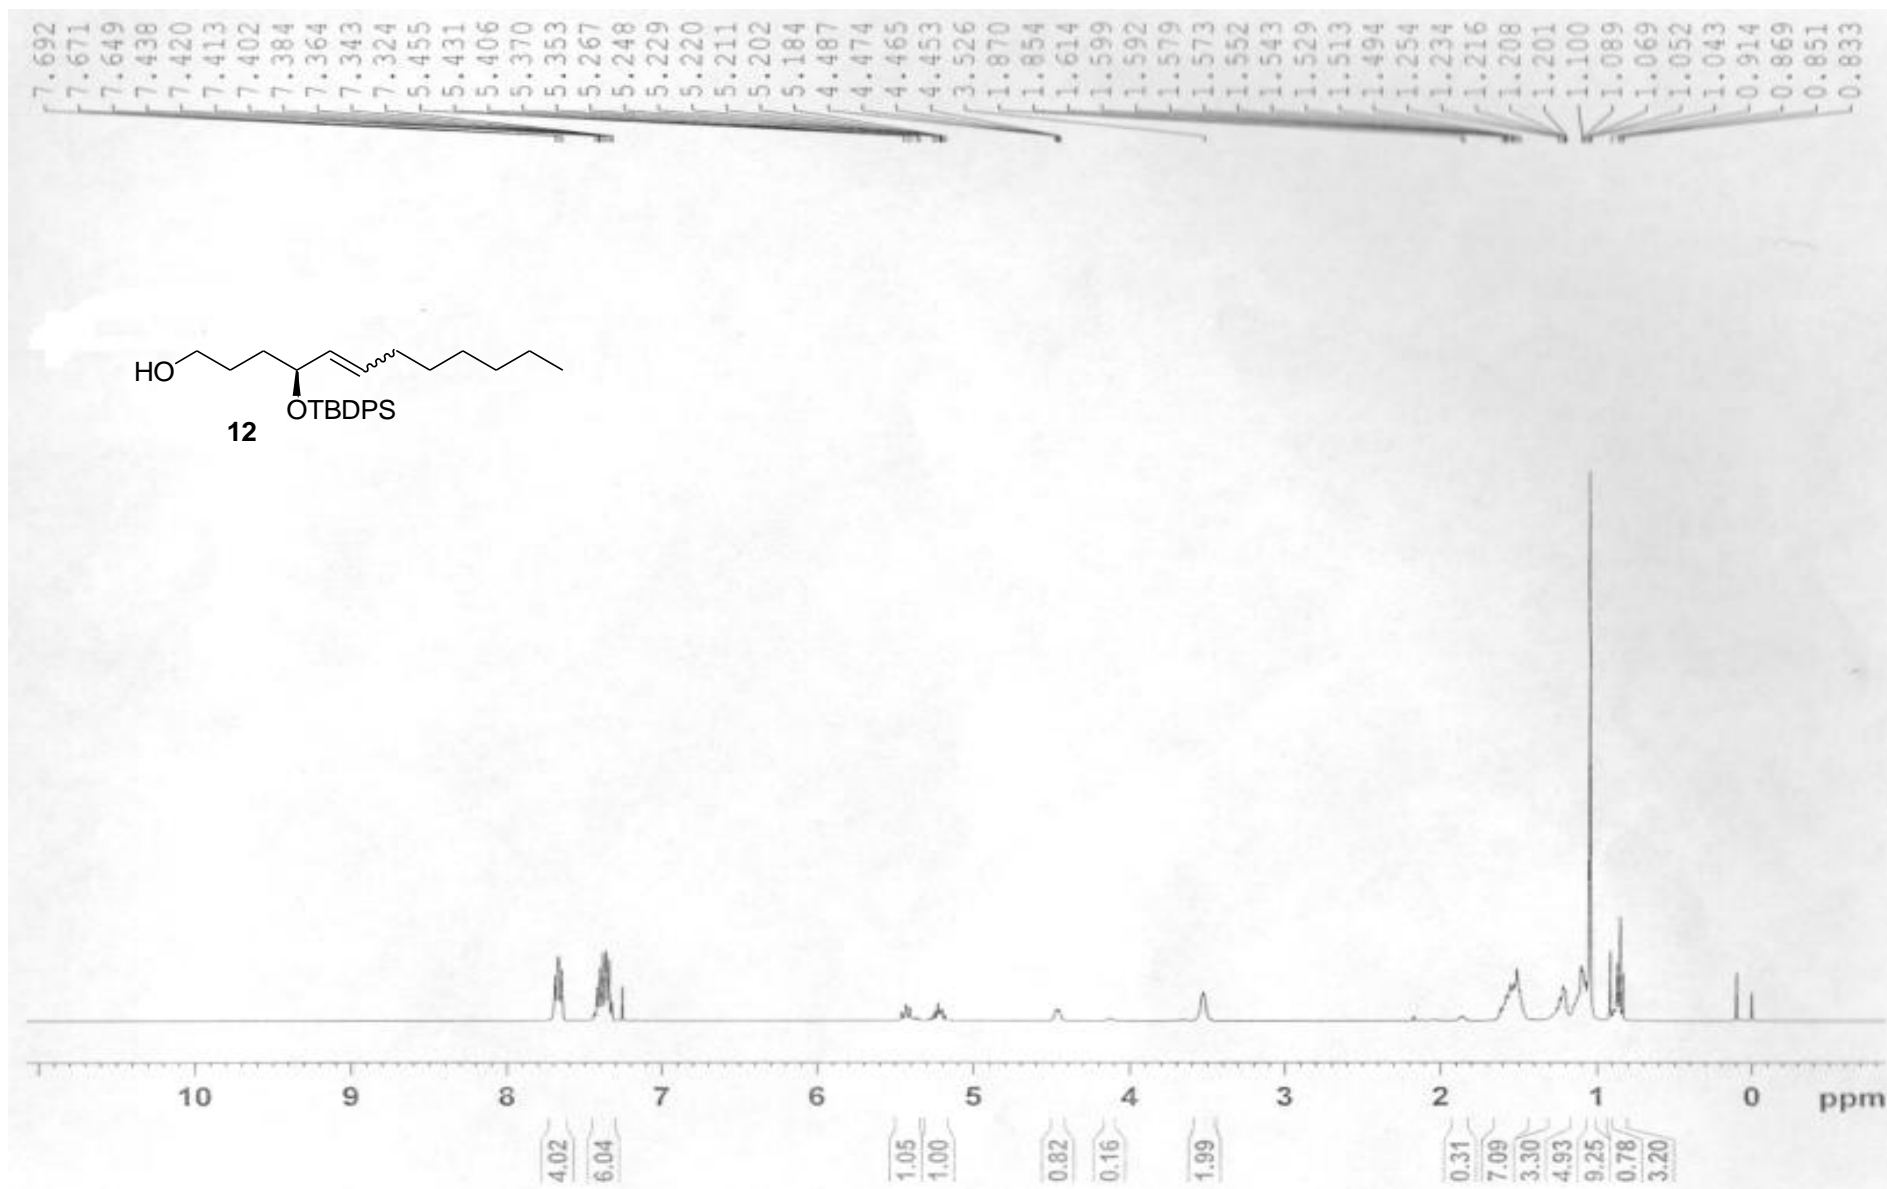

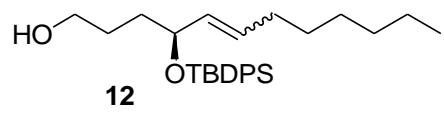

136.06  
136.01  
135.90  
134.36  
134.14  
132.31  
130.20  
129.57  
129.45  
127.52  
127.48  
127.34  
127.29

69.30  
63.03  
34.68  
31.66  
29.40  
28.98  
28.06  
27.62  
27.00  
22.58  
19.28  
14.10

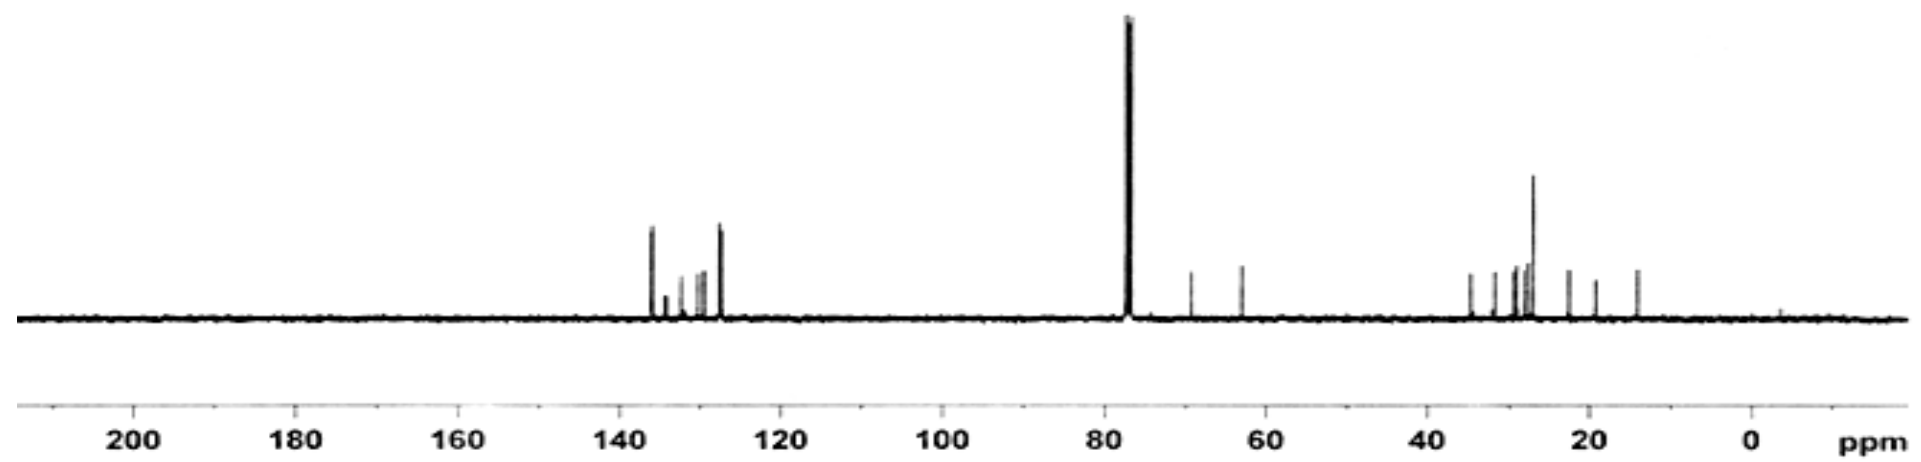



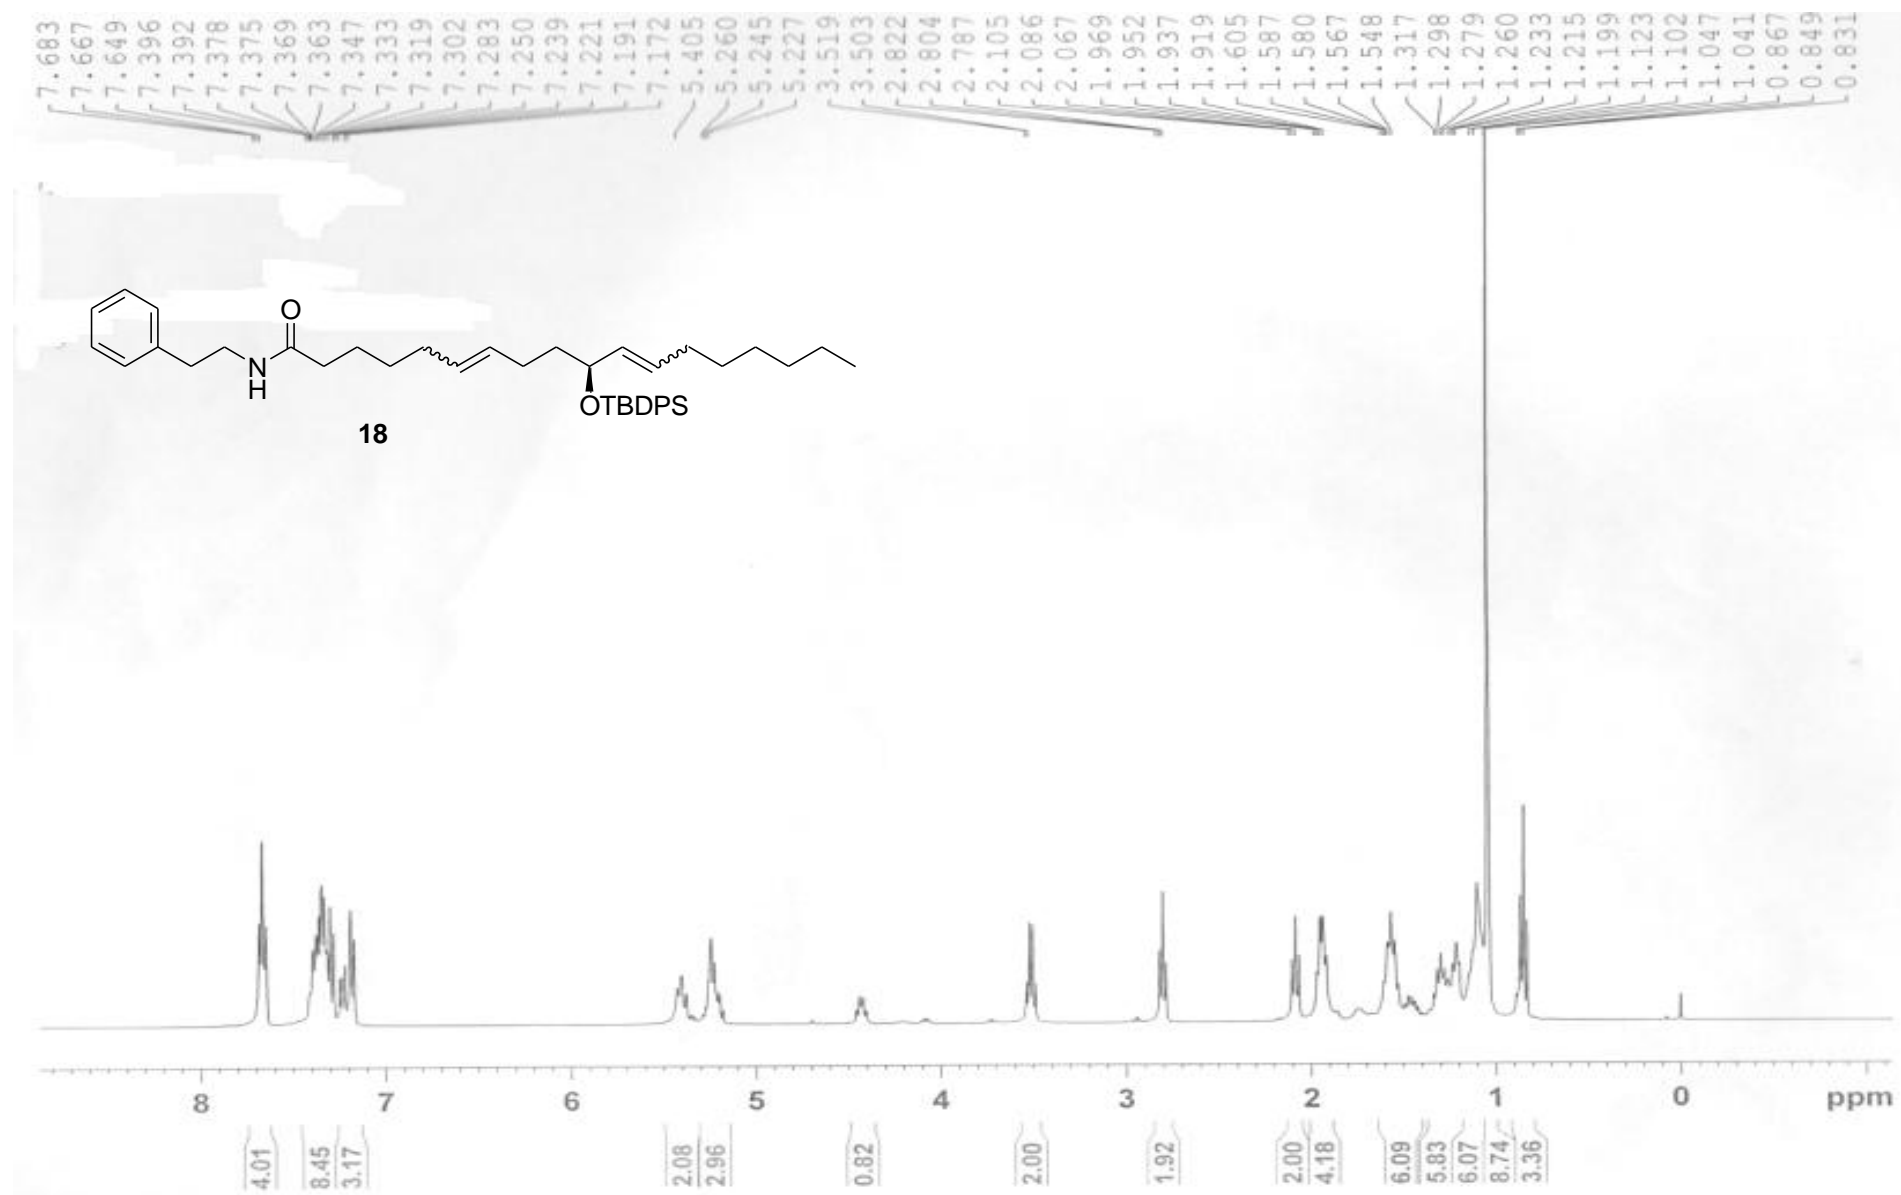

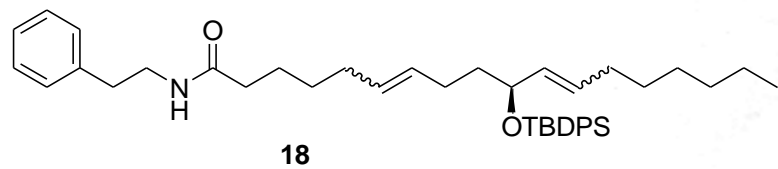

—172.91  
 138.94  
 136.01  
 135.91  
 134.57  
 134.39  
 132.58  
 130.17  
 129.91  
 129.46  
 129.38  
 129.33  
 128.78  
 128.65  
 127.46  
 127.31  
 126.52

—69.35  
 40.51  
 38.56  
 36.73  
 35.75  
 31.68  
 29.44  
 29.28  
 28.97  
 27.63  
 27.09  
 27.03  
 26.86  
 25.36  
 22.85  
 22.58  
 19.31  
 14.11

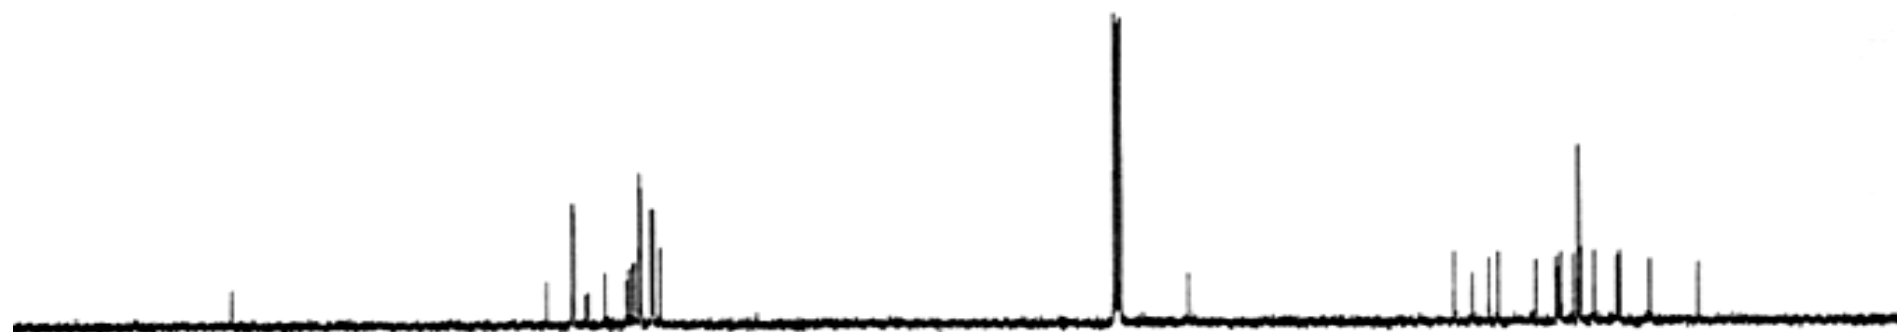

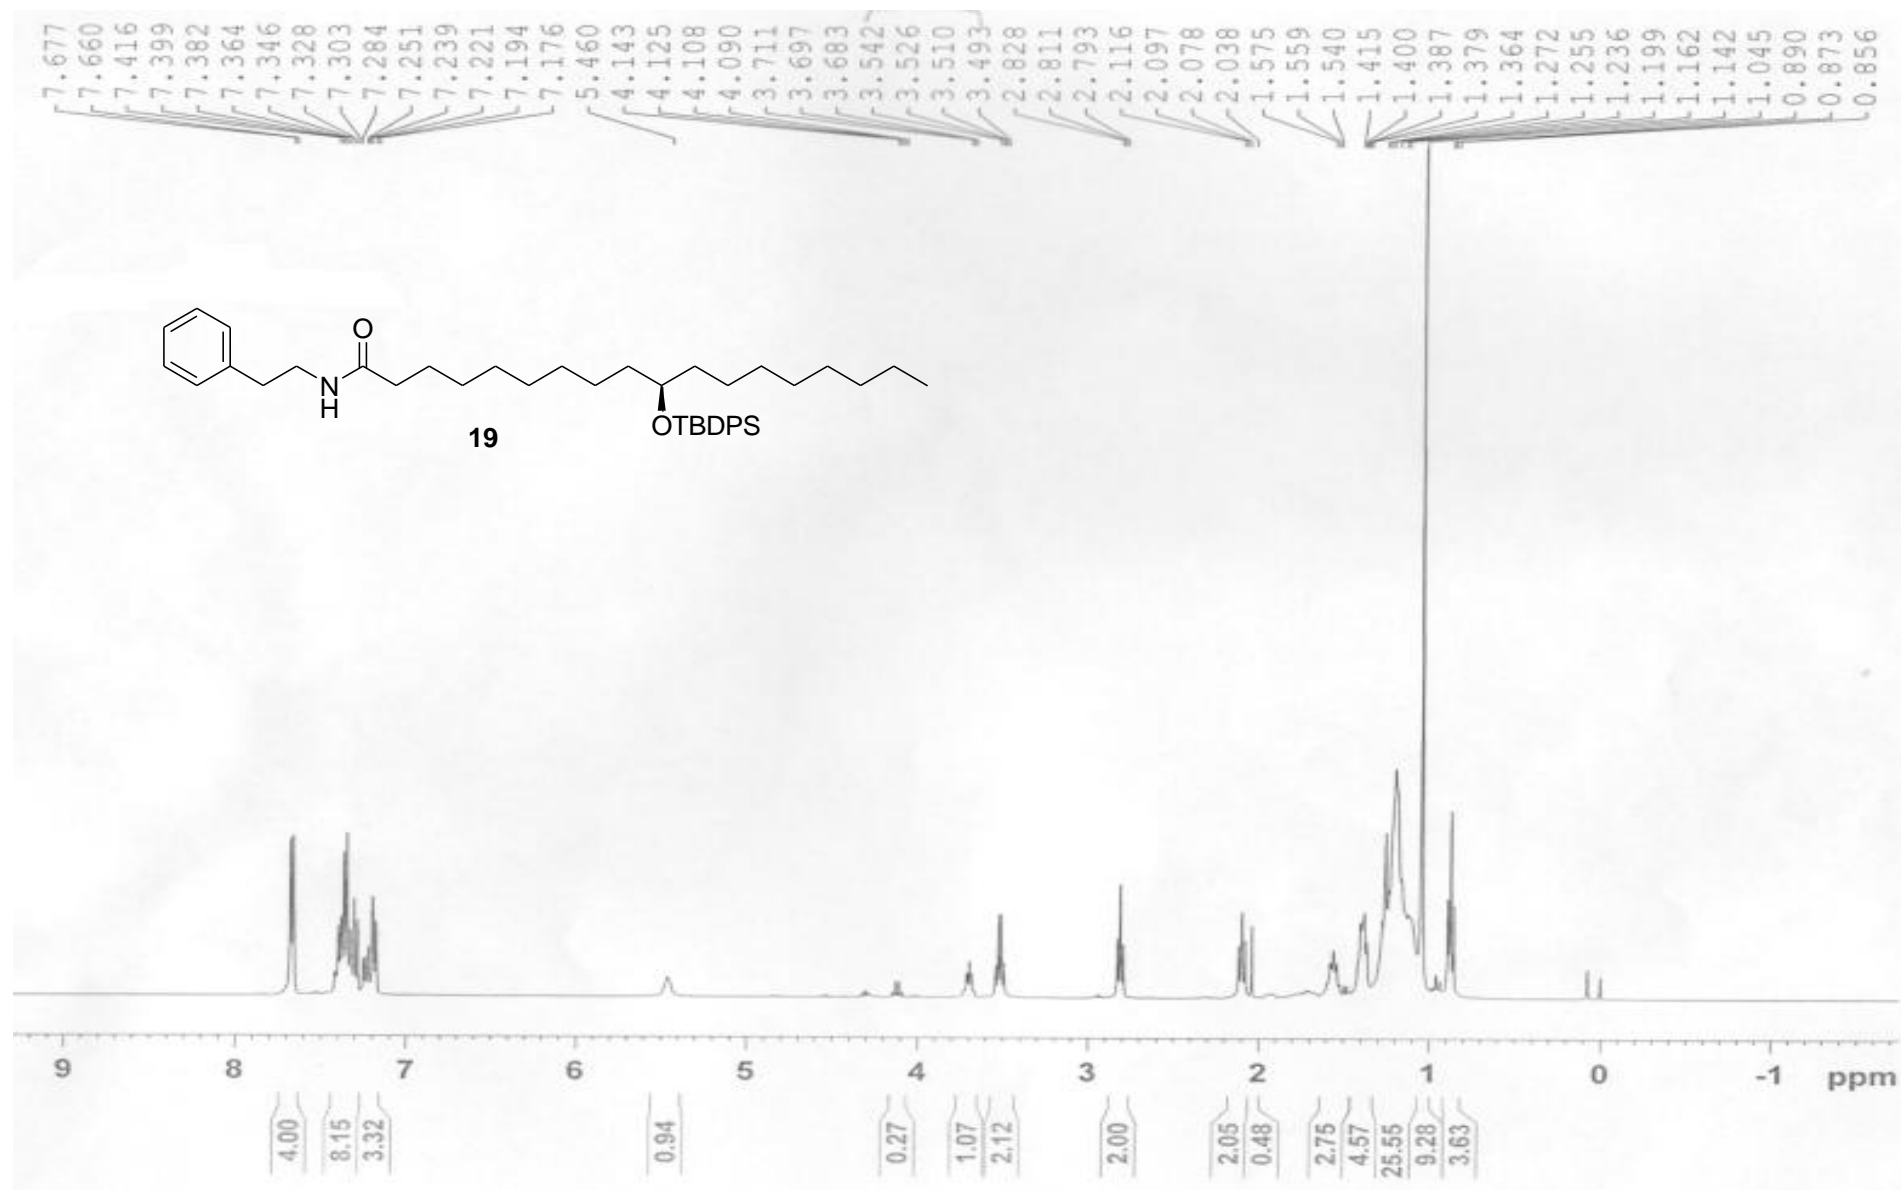

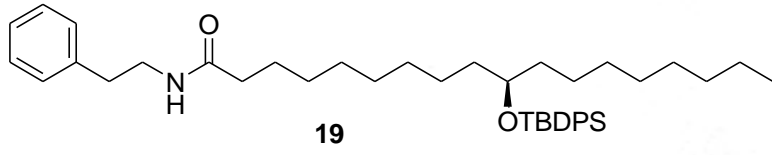

—173.15

138.96  
135.96  
134.87  
129.35  
128.78  
128.64  
127.36  
126.51

—73.29

40.50  
36.86  
36.35  
35.74  
31.88  
29.70  
29.68  
29.53  
29.42  
29.30  
29.25  
27.12  
25.76  
24.89  
22.69  
19.44  
14.14

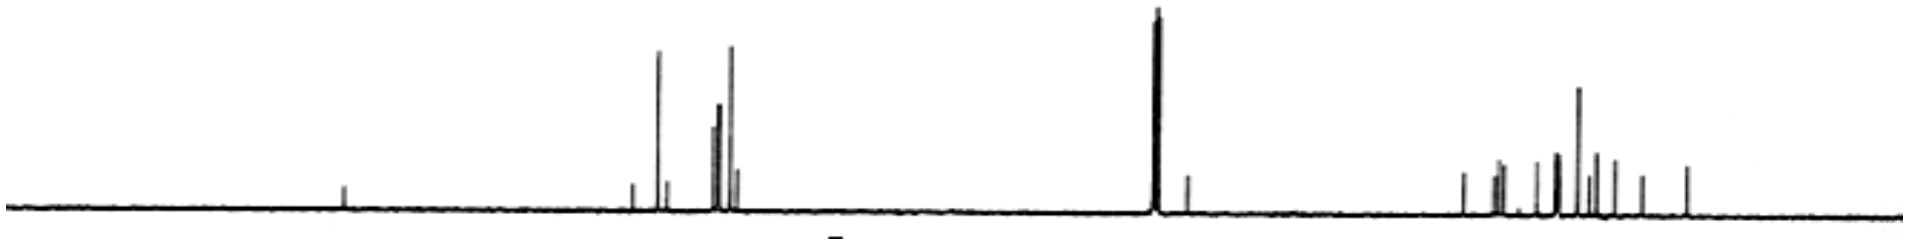

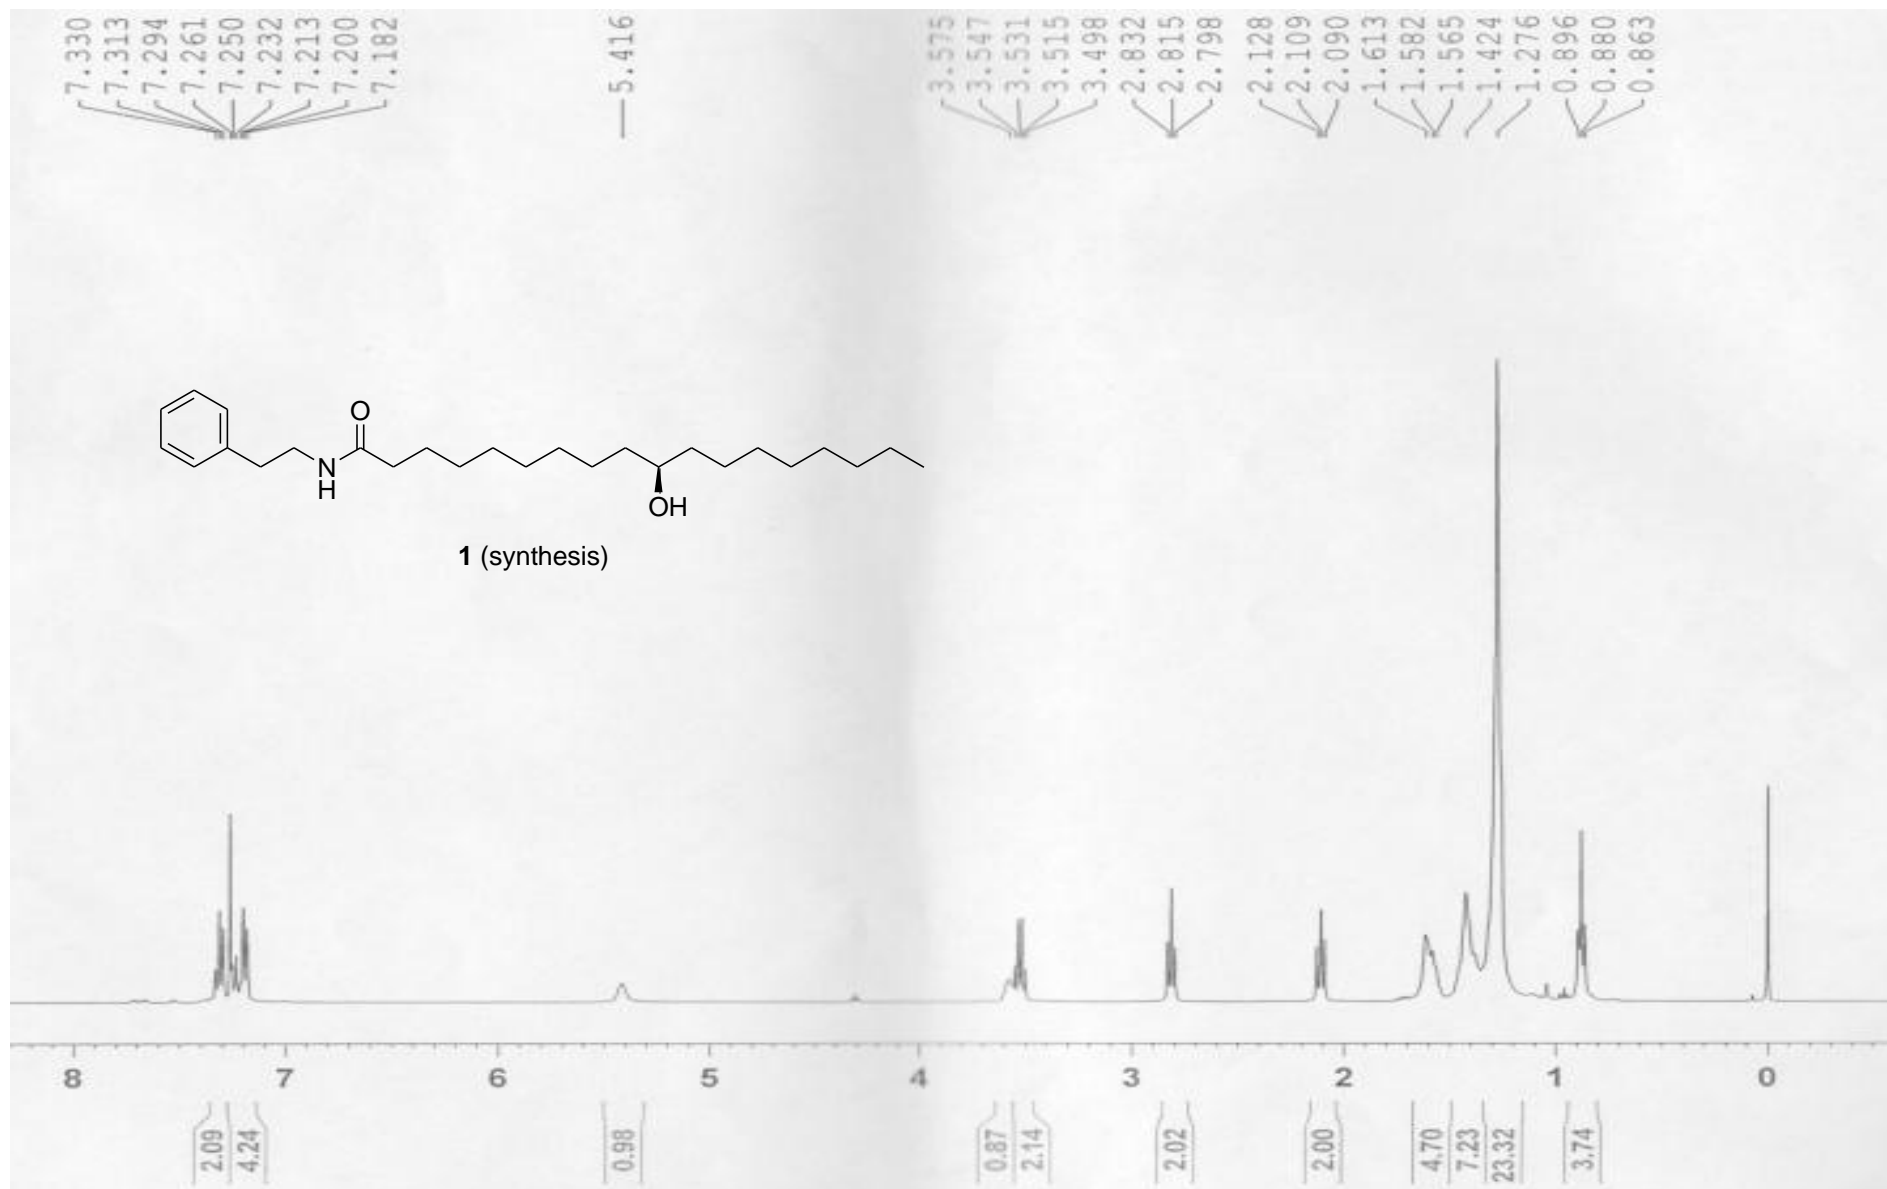

—173.13

—138.97

128.77

128.62

126.49

—71.98

40.49

37.53

37.45

36.80

35.73

31.88

29.73

29.61

29.40

29.28

29.24

29.21

25.71

25.67

25.60

22.67

14.10

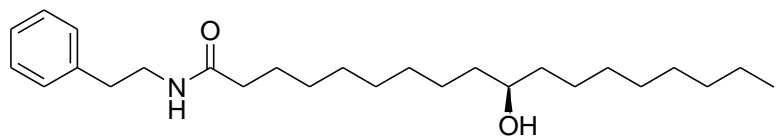

1 (synthesis)

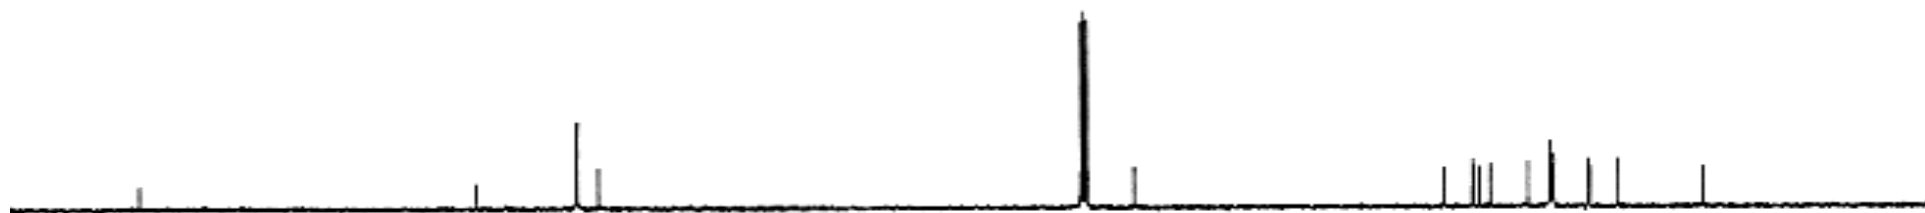

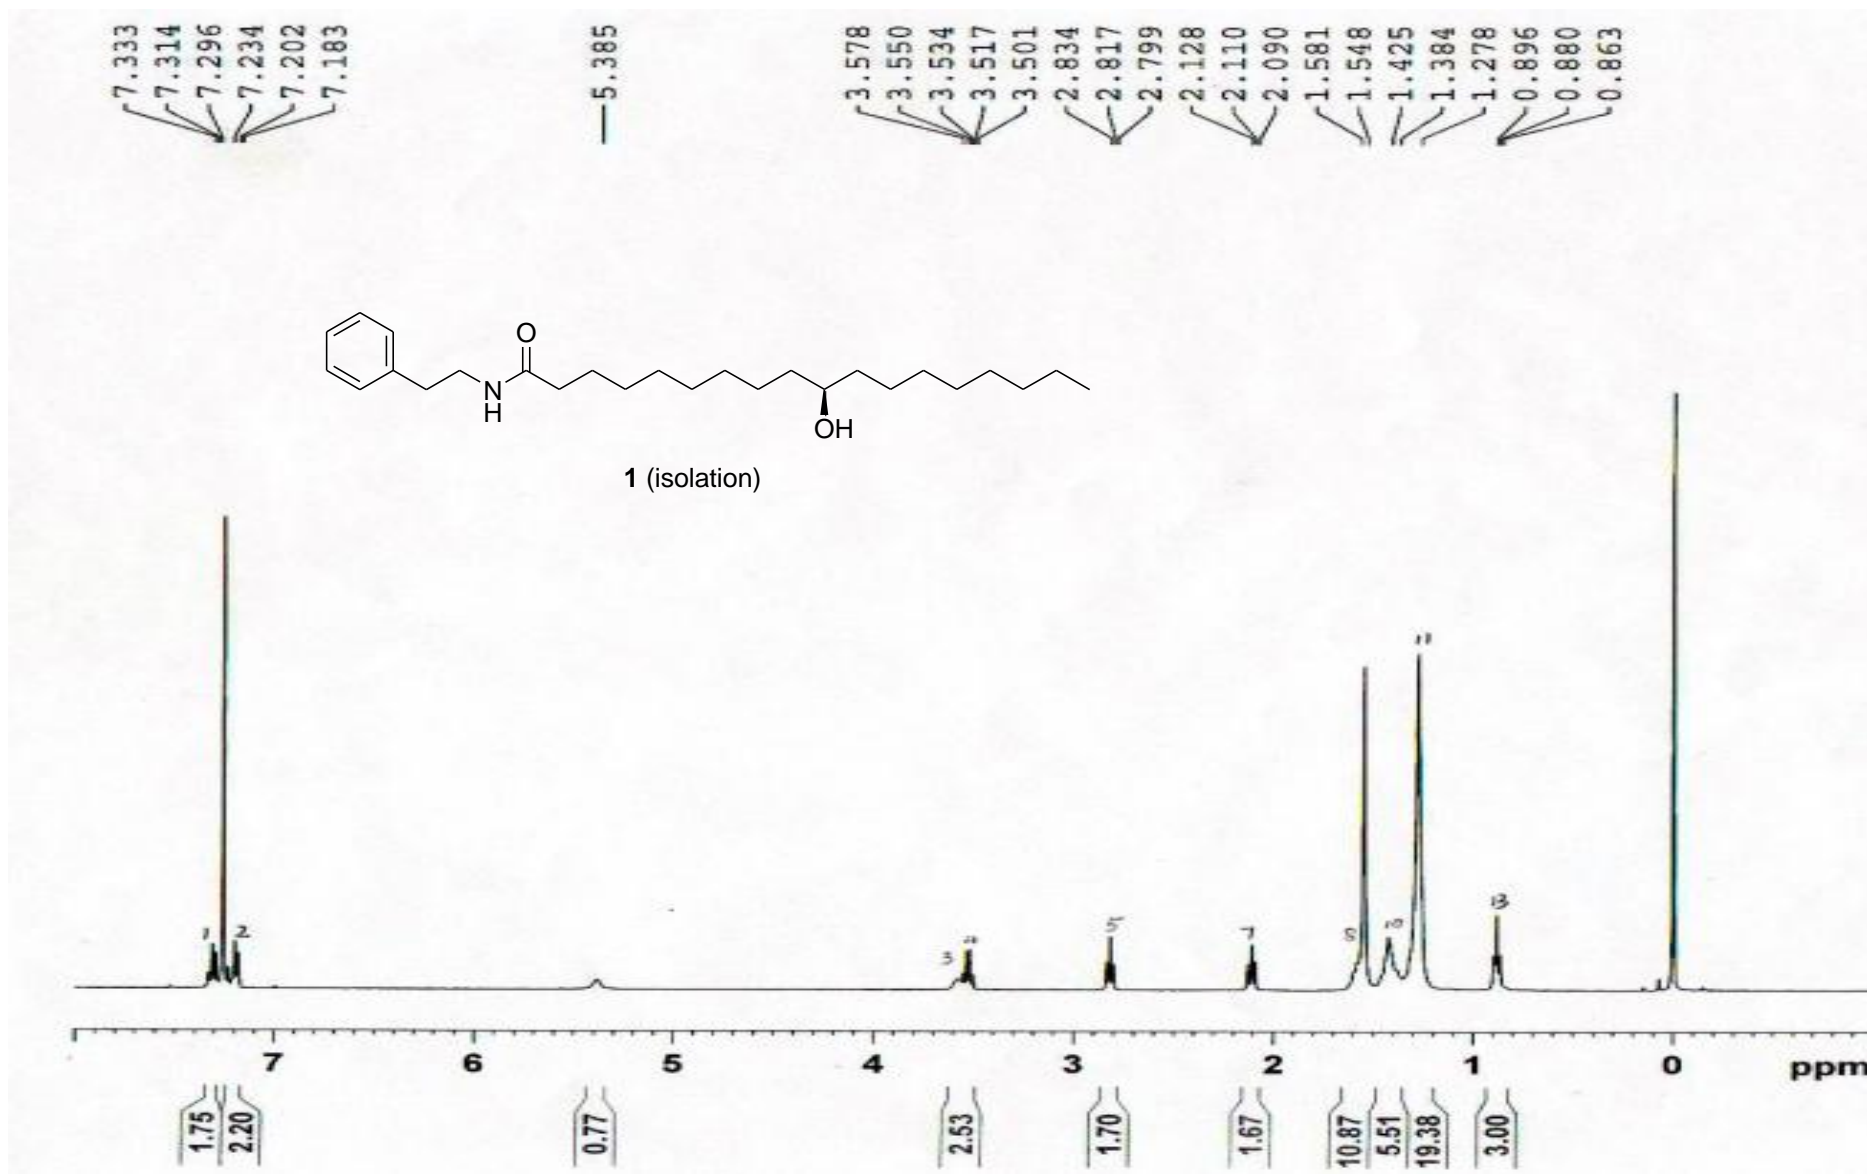

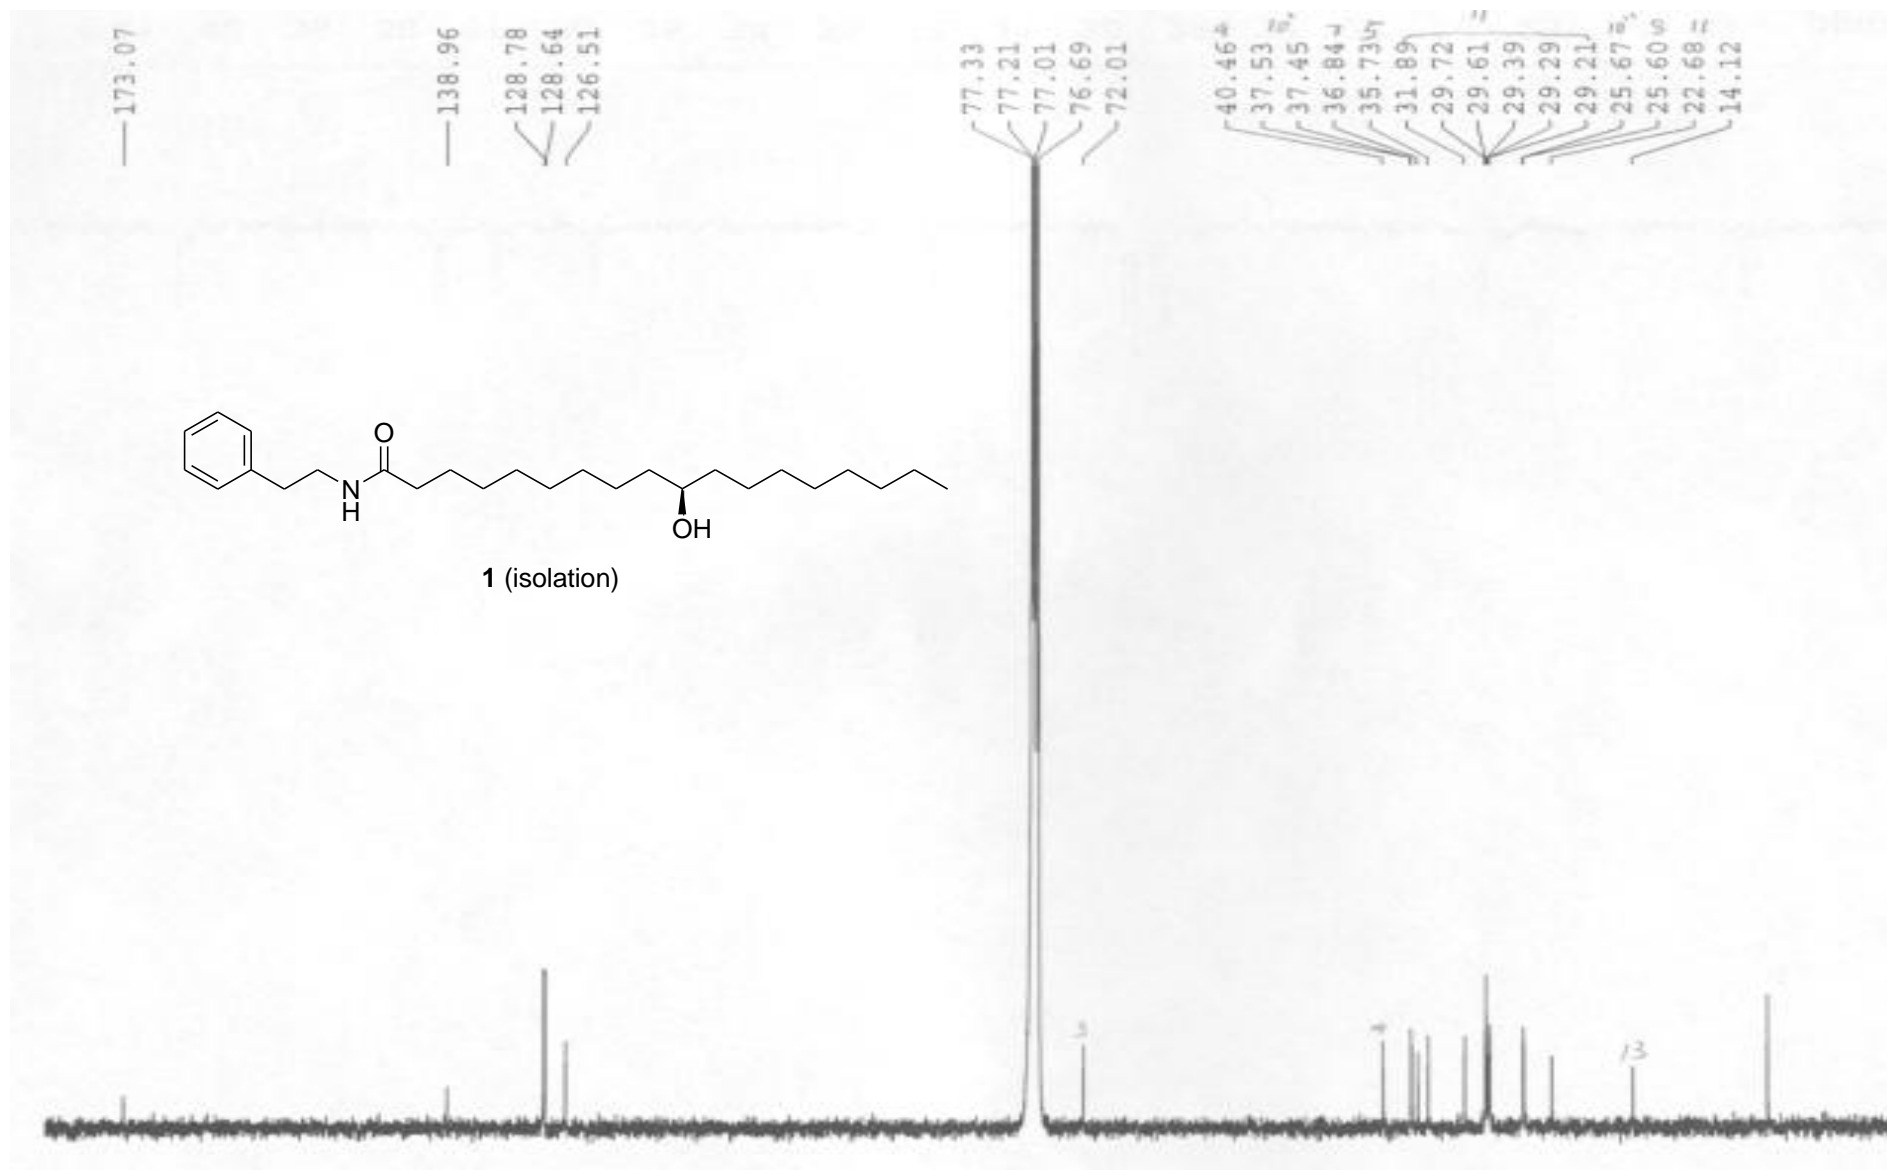



HMQC of compound 1

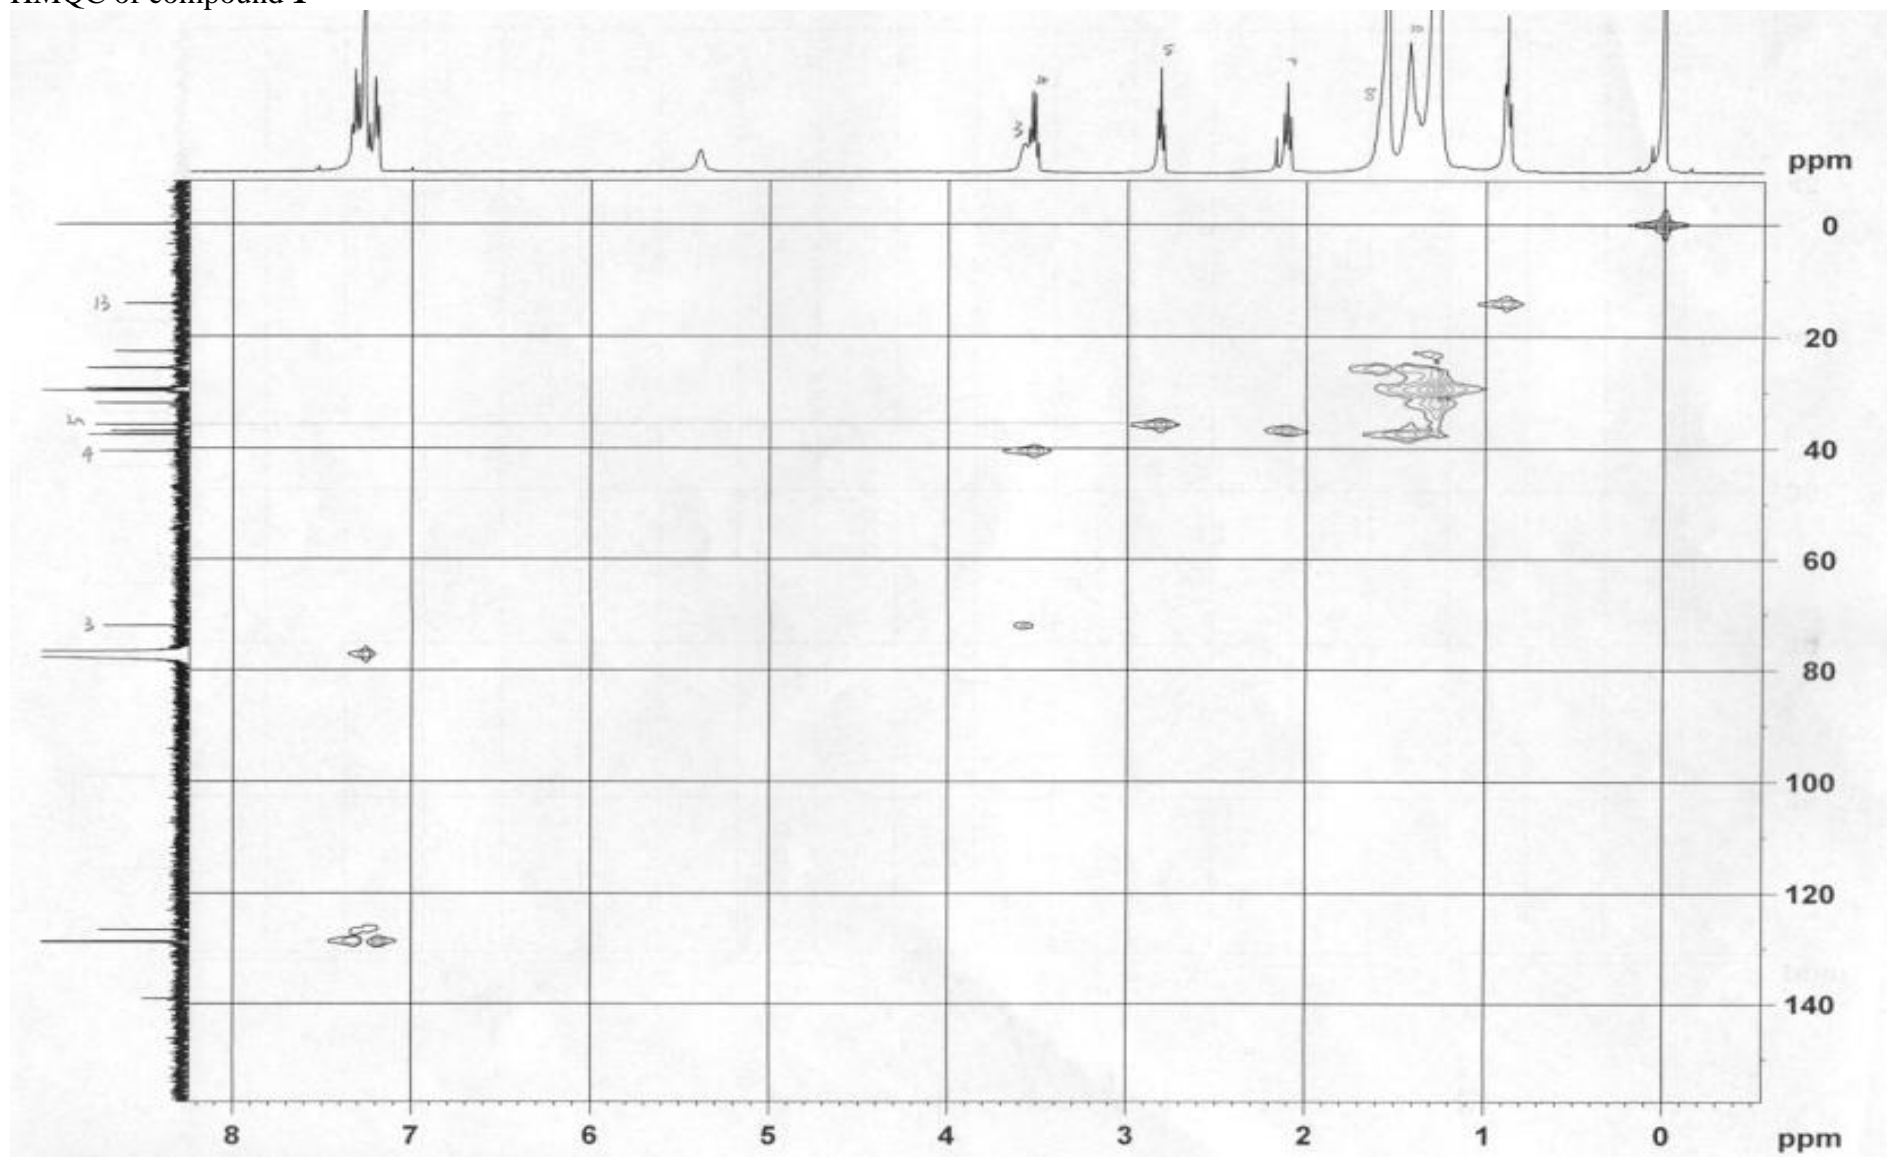



HMBC of compound 1

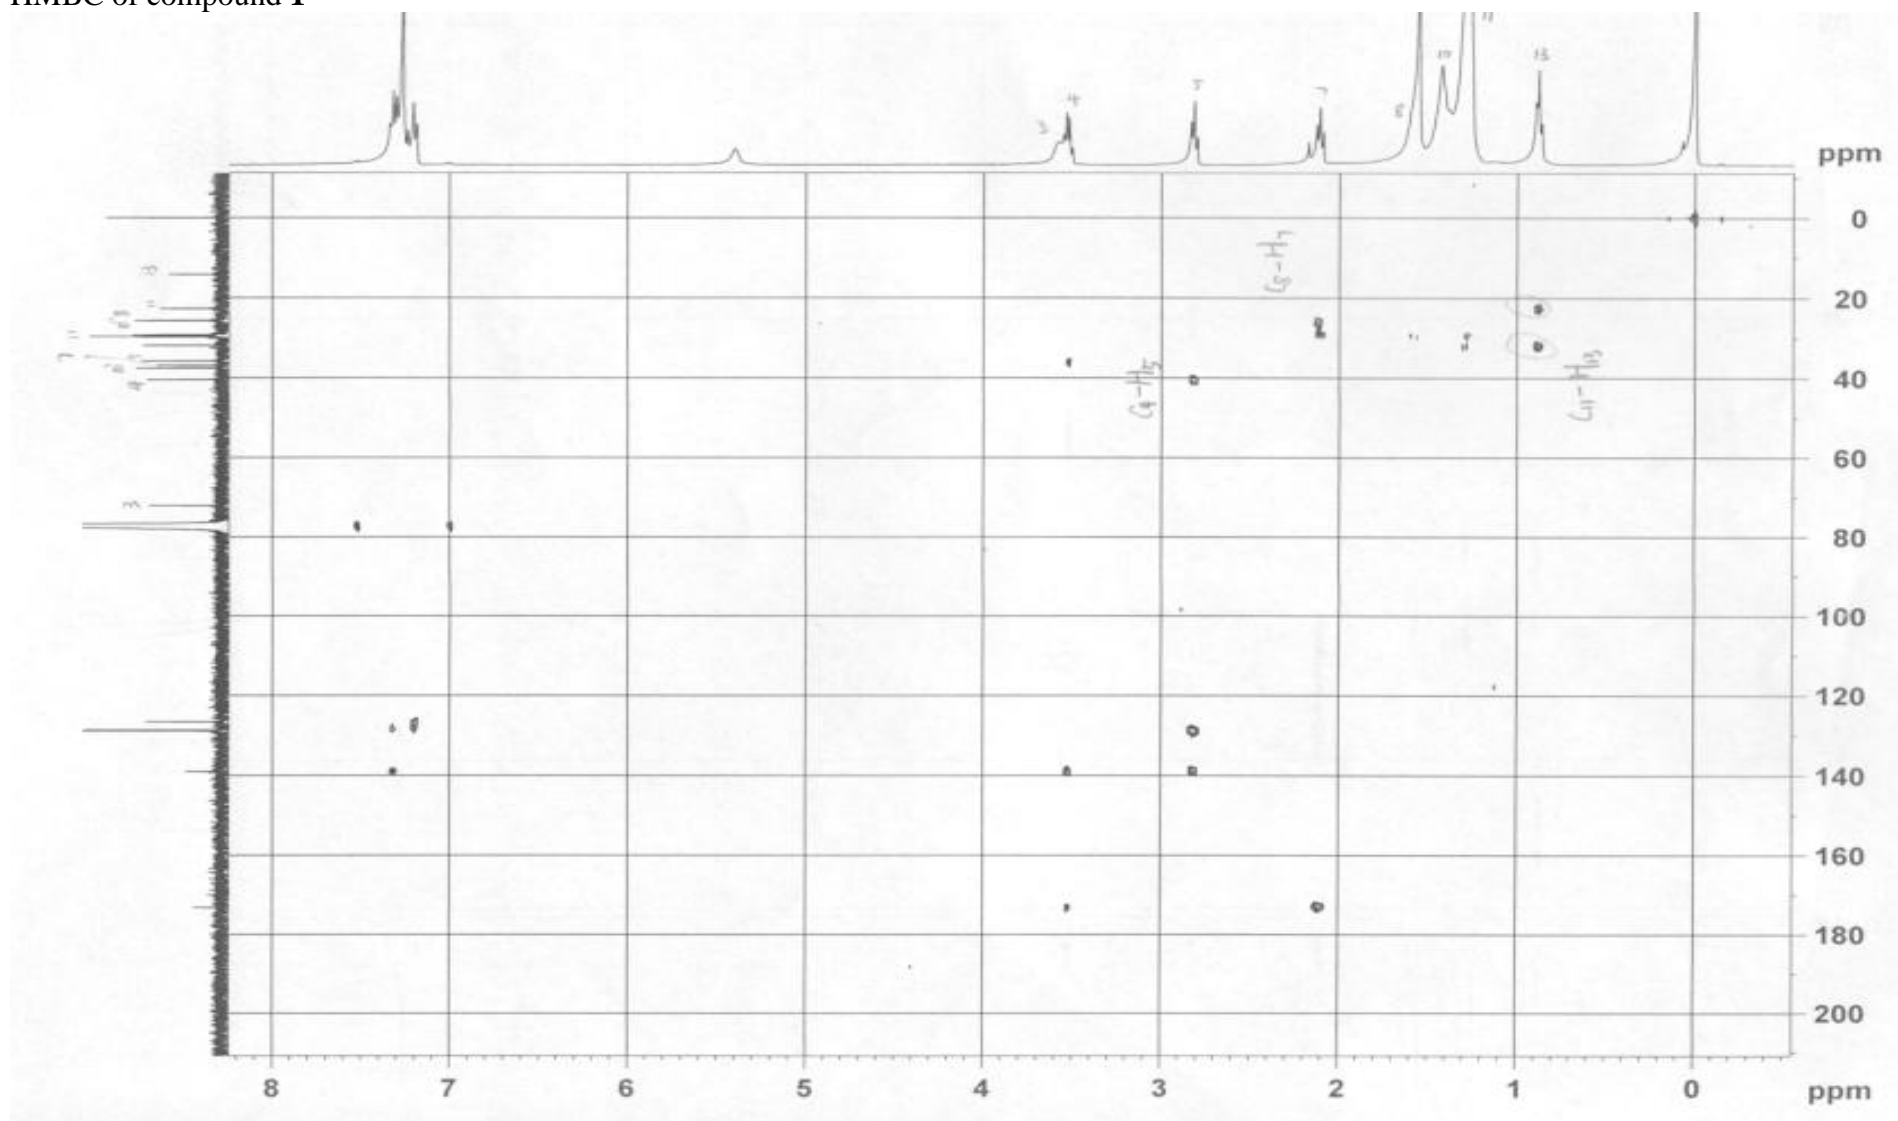

Supplement: Additional file 1 [file 1860-5397-7-158-S1.pdf]
